1  
2  
3  
4  
5  
6  
7  
8  
9  
10  
11  
12  
13  
14  
15  
16  
17  
18  
19  
20  
21  
22  
23  
24  
25  
26  
27  
28  
29  
30  
31  
32  
33

## Redefining tumor classification and clinical stratification through a colorectal cancer single-cell atlas

Ateeq M. Khaliq<sup>1,\*</sup>, Zeyneb Kurt<sup>2,\*</sup>, Miles W. Grunvald<sup>1,\*</sup>, Cihat Erdogan<sup>3</sup>, Sevgi S. Turgut<sup>3</sup>, Tim Rand<sup>4</sup>, Sonal Khare<sup>4</sup>, Jefferey A. Borgia<sup>1</sup>, Dana M. Hayden<sup>1</sup>, Sam G. Pappas<sup>1</sup>, Henry R. Govekar<sup>1</sup>, Anuradha R. Bhama<sup>1</sup>, Ajaypal Singh<sup>1</sup>, Richard A. Jacobson<sup>1</sup>, Audrey E. Kam<sup>1</sup>, Andrew Zloza<sup>1</sup>, Jochen Reiser<sup>1</sup>, Daniel V. Catenacci<sup>5</sup>, Kiran Turaga<sup>5</sup>, Milan Radovich<sup>6</sup>, Sheeno Thyparambil<sup>7</sup>, Mia A. Levy<sup>1</sup>, Janakiraman Subramanian<sup>8</sup>, Timothy M. Kuzel<sup>1</sup>, Anguraj Sadanandam<sup>9</sup>, Arif Hussain<sup>10</sup>, Bassel El-Rayes<sup>11</sup>, Ameen A. Salahudeen<sup>4</sup>✉, Ashiq Masood<sup>1</sup>✉

### Affiliations:

<sup>1</sup>Rush University Medical Center, Chicago, IL, USA.

<sup>2</sup>Northumbria University, Newcastle Upon Tyne, UK.

<sup>3</sup>Isparta University of Applied Sciences, Isparta, Turkey.

<sup>4</sup>Tempus Labs, Inc., Chicago, IL, USA.

<sup>5</sup>The University of Chicago, Chicago, IL, USA.

<sup>6</sup>Indiana University School of Medicine, Indianapolis, IN, USA.

<sup>7</sup>mProbe Inc. Rockville, Maryland, USA

<sup>8</sup>University of Missouri-Kansas City School of Medicine, Kansas City, MO, USA.

<sup>9</sup>Institute of Cancer Research, London, UK.

<sup>10</sup>University of Maryland Marlene and Stewart Greenebaum Comprehensive Cancer Center, Baltimore, MD USA.

<sup>11</sup>Emory University Winship Cancer Institute, Atlanta, GA, USA.

\*These authors contributed equally: Ateeq M. Khaliq, Zeyneb Kurt and Miles W. Grunvald.

✉ e-mail: [ashiq\\_masood@rush.edu](mailto:ashiq_masood@rush.edu); [ameen@tempus.com](mailto:ameen@tempus.com)

34 **ABSTRACT**

35

36 Colorectal cancer (CRC), a disease of high incidence and mortality, exhibits a large degree of  
37 inter- and intra-tumoral heterogeneity. The cellular etiology of this heterogeneity is poorly  
38 understood. Here, we generated and analyzed a single-cell transcriptome atlas of 49,859 CRC  
39 cells from 16 patients, validated with an additional 31,383 cells from an independent CRC patient  
40 cohort. We describe subclonal transcriptomic heterogeneity of CRC tumor epithelial cells, as well  
41 as discrete stromal populations of cancer-associated fibroblasts (CAFs). Within CRC CAFs, we  
42 identify the transcriptional signature of specific subtypes that significantly stratifies overall survival  
43 in more than 1,500 CRC patients with bulk transcriptomic data. We demonstrate that scRNA  
44 analysis of malignant, stromal, and immune cells exhibit a more complex picture than portrayed  
45 by bulk transcriptomic-based Consensus Molecular Subtypes (CMS) classification. By  
46 demonstrating an abundant degree of heterogeneity amongst these cell types, our work shows  
47 that CRC is best represented in a transcriptomic continuum crossing traditional classification  
48 systems boundaries. Overall, this CRC cell map provides a framework to re-evaluate CRC tumor  
49 biology with implications for clinical trial design and therapeutic development.

50

51

52

53

54

55

56

57

58

59

60

61

62

63

64

65

66

67



68 **Main**

69 Colorectal cancer (CRC) is the third most commonly diagnosed cancer and a leading cause of  
70 cancer-related mortality worldwide<sup>1,2</sup>. Approximately 50% of patients experience disease relapse  
71 following curative-intent surgical resection and chemotherapy<sup>3,4</sup>. Despite the high incidence and  
72 mortality of advanced CRC, few effective therapies have been approved in the past several  
73 decades<sup>5</sup>. One barrier to the development of efficacious therapeutics is the biological  
74 heterogeneity of CRC and its variable clinical course<sup>6</sup>. While landmark studies from The Cancer  
75 Genome Atlas (TCGA) have defined the somatic mutational landscape within CRC, several  
76 studies have shown that stromal signatures, including fibroblasts and cytotoxic T cells, are likely  
77 the main drivers of clinical outcomes<sup>7-12</sup>. These findings suggest that the clinical phenotypes of  
78 CRC and by extension, its tumor biology, is shaped by a complex niche of heterotypic cell  
79 interactions within the tumor microenvironment (TME)<sup>8-12</sup>.

80  
81 Bulk gene expression analyses by several independent groups have identified distinct CRC  
82 subtypes<sup>13-15</sup>. Reflecting both the tumor and TME, an international consortium published the  
83 Consensus Molecular Subtypes (CMS), which proposed four distinct subtypes of CRC<sup>13,14,16</sup>.  
84 Unfortunately, the association between CMS and meaningful therapeutic response to specific  
85 agents have shown inconsistent results across studies and CMS lacks a concordance between  
86 primary and metastatic CRC tumors, limiting its utility thus for in clinical decision making<sup>17-24</sup>. As  
87 a result, an improved CMS classification or an alternative classification system is required to  
88 improve clinical utility.

89  
90 To overcome the limitations of bulk-RNA sequence profiling, we utilized single-cell RNA  
91 sequencing (scRNA-seq) to more thoroughly evaluate the CRC subtypes at the molecular level,  
92 including within the context of the currently defined CMS classification. We dissected heterotropic  
93 cell states of tumor epithelia and stromal cells, including a cancer-associated fibroblast

94 (CAF) population. The CAF population's clinical and prognostic significance became apparent  
95 when CAF signatures were applied to large, independent CRC transcriptomic cohorts.

96

## 97 **RESULTS**

98 We profiled sixteen primary colon tissue samples and eight adjacent non-malignant tissues (24 in  
99 total) using droplet-based, scRNA-seq. Altogether, we captured and retained 49,589 single cells  
100 after performing quality control for downstream analysis (**Fig. 1a, supplementary table 1**). All  
101 scRNA-seq data were merged and normalized to identify robust discrete clusters of epithelial cells  
102 (*EPCAM+*, *KRT8+*, and *KRT18+*), fibroblasts (*COL1A2+*), endothelial cells (*CD31+*), T cells  
103 (*CD3D+*), B cells (*CD79A+*), and myeloid cells (*LYZ+*) using canonical marker genes. Additionally,  
104 each cell type compartment was analyzed separately. Cluster v0.4.1 and manual review of  
105 differentially expressed genes in each subcluster were studied to choose the best cluster  
106 resolution without cluster destabilization (see methods)<sup>25</sup>. Cell population designation was  
107 chosen by specific gene expression, and SingleR was also utilized for unbiased cell type  
108 recognition (see methods)<sup>26-29</sup>.

109

110 In addition to cancer cells, we identified diverse TME cell phenotypes, including fibroblasts  
111 subsets (*CAF-S1* and *CAF-S4*), endothelial cells, CD4+ subsets (*naïve/memory*, *Th17*, and  
112 *Tregs*), CD8+ subsets (*naïve/memory*, *cytotoxic*, *tissue-resident memory*, and *Mucosa-*  
113 *Associated Invariant (MAIT) cells*), NK cells, innate lymphoid cell (ILC) types, B cell phenotypes  
114 (*naïve*, *memory*, *germinal center*, and *plasma cells*), and monocyte lineage phenotypes (*C1DC+*  
115 *dendritic cells*, *proinflammatory monocytes* [*IL1B*, *IL6*, *S100A8*, and *S100A9*]), and M2 polarized  
116 anti-inflammatory [*CD163*, *SEPP1*, *APOE*, and *MAF*]), tumor-associated macrophages (TAMs)  
117 (**Fig. 1b-d, Extended Data Figs. 1-3, and Extended Data Tables 1-4**)<sup>26-29</sup>.

118

119 For validation, we additionally profiled 31,383 high-quality, single cells from an independent cohort  
120 using stringent criteria to corroborate our findings (see methods)<sup>30</sup>. Thus, a total of 81,242 high-  
121 quality cells were profiled to produce a single-cell map of 40 colorectal cancer patients. The results  
122 of the primary CRC cohort (49,859 single-cells) are available at the Colon Cancer Atlas  
123 ([www.websiteinprogress.com](http://www.websiteinprogress.com)).

124

## 125 **Malignant colon cancer reveals tumor epithelial cell subclonal heterogeneity and** 126 **stochastic behavior.**

127

128 We detected 8,965 tumor and benign epithelial cells (*EPCAM*<sup>+</sup>, *KRT8*<sup>+</sup>, and *KRT18*<sup>+</sup>) and, on  
129 reclustering, produced 17 epithelial clusters (designated C1 to C17) (**Fig. 2a and Supplementary**  
130 **Table 2**). Clusters were chiefly influenced by colonic epithelial markers, including those for  
131 stemness (*LGR5*, *ASCL2*, *OLFM4*, and *STMN1*), enterocytes (*FABP1* and *CA2*), goblet cells  
132 (*ZG16*, *MUC2*, *SPINK4*, and *TFF3*), and enteroendocrine cells (*PYY* and *CHGA*)  
133 (**Supplementary Fig. 2a and Supplementary Table 2**). Some tumor-derived clusters (C7, C8,  
134 and C13) did not express known colon epithelial markers, potentially representing a de-  
135 differentiated state of plasticity (**Supplementary Fig. 2b**)<sup>31</sup>. Each distinct tumor-derived cluster  
136 was predominantly patient-specific, reflecting a high degree of inter-patient tumoral cell  
137 heterogeneity. In contrast, epithelial populations derived from non-malignant tissue samples from  
138 multiple patients clustered together, a pattern observed in previous studies confirming both  
139 normal tissue homeostasis and limited sample batch effects (**Fig. 2a**)<sup>32,33</sup>.

140

141 We next aimed to identify gene expression programs shared across these clusters using hallmark  
142 pathway analysis<sup>34</sup>. A strong overlap was observed for multiple pathways such as activation of  
143 inflammatory, epithelial-mesenchymal transformation (EMT), immune response, and metabolic  
144 pathways (**Fig. 2b**). Interestingly, high microsatellite instability (MSI-H) and microsatellite stable

145 (MSS) CRC tumors, considered clinically separate entities, demonstrated similar pathway  
146 program activation within the tumor epithelial populations. Each cluster also showed activation of  
147 unique pathways such as activation of angiogenesis (C6), Notch signaling (C14), apoptosis (C11),  
148 hypoxia (C11), and TNF signaling dysregulation (C15), among others. However, MSI-H tumors  
149 differed from MSS tumors based on immune cell infiltration (**Extended Data Fig. 1**).

150  
151 Since intratumoral heterogeneity is recognized as a key mechanism contributing to drug  
152 resistance, cancer progression, and recurrence, we next focused on dissecting potential  
153 transcriptomic states to identify heterogeneity within each patient's tumor<sup>35-38</sup>. We found that each  
154 tumor specimen contained 2-10 distinct tumor epithelial clusters (**Fig. 2c**). Gene set variation  
155 analysis (GSVA) was performed on cells from individual tumor samples and illustrated the sub-  
156 clonal transcriptomic heterogeneity within each specimen (**Supplementary Fig. 2c**)<sup>39</sup>. Clusters  
157 identified in individual pathway analysis demonstrated the up- or down-regulation of crucial  
158 metabolic and oncogenic pathways between samples, suggesting wide phenotype variations  
159 between cells from the same tumor<sup>40</sup>.

160  
161 Given the evidence of intratumoral epithelial heterogeneity, we next performed trajectory  
162 inference using pseudotime analysis to identify potential alignments or lineage relationships (i.e.,  
163 right versus left-sided CRC), CMS classification, or MSI status  
164 (**Fig. 2d**)<sup>41,42</sup>. This analysis also served as a control for inter-patient genomic heterogeneity and  
165 provided an orthogonal strategy to confirm the transcriptomic trends we identified. We detected  
166 five molecular states (S1n/t to S5n/t) with malignant and normal epithelial cells intermixed along  
167 a joint transcriptional trajectory. This observation is consistent with prior studies demonstrating  
168 that CRC cells recapitulate normal colon epithelia's multilineage differentiation process as each  
169 transcriptional state's pathway activation in both normal and tumor cells was related to normal

170 colon epithelial function of nutrient absorption or maintaining colon homeostasis (**Supplementary**  
171 **Fig. 3 and Supplementary Table 3**)<sup>43,44</sup>.

172

173 Additionally, tumor cells showed upregulation of embryogenesis (S2t), consistent with previous  
174 findings that tumor cells revert to their embryological states in cancer development  
175 (**Supplementary Table 4**)<sup>45</sup>. Interestingly, there were no significant associations with anatomic  
176 location, CMS classification, or MSI status within our dataset or an independent dataset of 31,383  
177 single cells (**Supplementary Fig. 4**)<sup>30</sup>. Hence, in our analysis, CRC development mainly  
178 represents a hijacking of the normal epithelial differentiation program, coupled with the acquisition  
179 of additional cancer-related and embryogenic pathways (**Supplementary Fig. 3**)<sup>46</sup>.

180

181 **CRC-associated fibroblasts in the tumor microenvironment exhibit diverse phenotypes,**  
182 **and specific subtypes are associated with poor prognosis.**

183

184 We next focused on CRC TME subpopulations. High-quality 819 fibroblasts were re-clustered into  
185 eight clusters, and then phenotypically classified into two major subtypes to assess for further  
186 CAF heterogeneity. These phenotypic subtypes were found to be immunomodulatory CAF-S1  
187 (*PDGFRA*+ and *PDPN*+) and prometastatic CAF-S4 (*RGS5*+ and *MCAM*+) (**Fig. 3 and**  
188 **Supplementary Table 4**)<sup>47</sup>. This fibroblast cluster dichotomy was also observed in the  
189 independent CRC patient scRNA-seq dataset of 31,383 cells (**Supplementary Fig. 5**)<sup>30</sup>.

190

191 The CAF-S1 and CAF-S4 subtypes showed striking resemblances to the mCAF (extracellular  
192 matrix) and vCAF (vascular) fibroblast subtypes, respectively, as previously described in a mouse  
193 breast cancer model<sup>48</sup>. Most clusters were found in multiple patients, albeit in varying proportions,  
194 signifying shared patterns in CAF transcriptomic programs between patients. Fibroblasts derived  
195 from MSI-H tumors were distributed similarly throughout these clusters.

196

197 CAF-S1 exhibited high chemokine expressions such as *CXCL1*, *CXCL2*, *CXCL12*, *CXCL14*, and  
198 immunomodulatory molecules including *TNFRSF12A* (**Supplementary Fig. 6**). Additionally,  
199 CAF-S1 expressed extracellular matrix genes including matrix-modifying enzymes (*LOXL1* and  
200 *LOX*)<sup>48</sup>. To determine this population's functional significance, we compared the CAF-S1  
201 population transcriptomes to those described recently in breast cancer, lung cancer, and head  
202 and neck cancer<sup>49</sup>. We recovered five CAF subtypes, within the CAF-S1 population, including  
203 *ecm-myCAF* (extracellular; *GJB+*), *IL-iCAF* (growth factor, *TNF* and interleukin pathway;  
204 *SCARA5+*), *detox-iCAF* (detoxification and inflammation; *ADH1B+*), *wound-myCAF* (collagen  
205 fibrils and wound healing; *SEMA3C*), and *TGF $\beta$ -myCAF* (*TGF- $\beta$*  signaling and matrisome;  
206 *CST1+*, *TGF $\beta$ 1+*), which were previously divided into two major subtypes: iCAF and myCAF (**Fig.**  
207 **3b**). Among these five subtypes, *ecm-myCAF* and *TGF $\beta$ -myCAF* are known to correlate with  
208 immunosuppressive environments and are enriched in tumors with high regulatory T lymphocytes  
209 (Tregs) and depleted CD8+ lymphocytes. Additionally, these subtypes are associated with  
210 primary immunotherapy resistance in melanoma and lung cancer<sup>49</sup>.

211

212 The CAF-S4 population expressed pericyte markers (*RGS5+*, *CSPG4+*, and *PDGFRA+*), *CD248*  
213 (*endosialin*), and *EPAS1* (*HIF2- $\alpha$* ), that this particular CAF subtype is vessel-associated, with  
214 hypoxia potentially contributing to invasion and metastasis, as has been shown in another study  
215 <sup>48</sup>. CAF-S4 clustered into the immature phenotype (*RGS5+*, *PDGFRB+*, and *CD36+*) and the  
216 differentiated myogenic subtype (*TAGLN+* and *MYH11+*)(**Fig. 3c and Supplementary Table**  
217 **4**)<sup>50</sup>.

218

219 Given the correlation between CMS4 and fibroblast infiltration, we next sought to test the  
220 existence of CAF-S1 and CAF-S4 signatures in bulk transcriptomic data and their association with  
221 clinical outcomes<sup>15</sup>. To this end, we interrogated and carried out a meta-analysis of eight

222 colorectal cancer transcriptomic datasets comprising 1,584 samples. We detected a strong and  
223 positive correlation between specific gene expressions characterizing each CAF subtype in CRC,  
224 pancreatic cancer, and non-small cell lung cancer (NSCLC) (**Fig. 4**) (see methods for datasets).  
225 The gene signatures were specific to each CAF-S1 and CAF-S4, thus confirming their existence  
226 in colorectal cancers and other tumor types.

227  
228 We found high CAF-S1 and CAF-S4 signatures associated with poor median overall-survival and  
229 early cancer recurrence ( $HR > 1$ ,  $p < 0.05$ ), irrespective of CMS subtypes in three independent CRC  
230 datasets (**Supplementary Fig 7**). Additionally, CAF signatures stratified the CMS4 subtype into  
231 high- and low-risk overall survival in all datasets, thus identifying additional heterogeneity and  
232 providing prognostication in this aggressive patient subgroup (**Fig. 4b-d**). Here, using scRNA-  
233 seq, we show for the first time that high CAF infiltration in CRC is associated with poor prognosis  
234 across all molecular subtypes, and which further stratifies the CMS4 subgroup into high and low-  
235 risk clinical phenotypes in CRC cohorts.

236  
237 **Single-cell RNA sequencing reveals heterogeneity beyond Consensus Molecular Subtypes**  
238 **in colorectal cancers and offers therapeutic opportunities.**

239  
240 The lack of association between tumor epithelia and CMS classification, as well as the survival  
241 differences between high- and low-risk CAF signatures across CRC molecular subtypes suggest  
242 CRCs are much more heterogeneous than the traditional classification systems have indicated  
243 (e.g. those systems defined by somatic alterations, epigenomic features, and bulk gene  
244 expression data)<sup>13,14,51,52</sup>.

245  
246 Among these the widely adopted CMS classification, which reflects both the malignant cell  
247 phenotypes and the TME, classified CRC into CMS1 (MSI immune), CMS2 (canonical), CMS3



248 (metabolic), and CMS4 (mesenchymal) subtypes based on bulk transcriptomic signatures<sup>15</sup>. To  
249 test our hypothesis, we estimated every cell type fraction using single-cell data from eight pooled  
250 datasets (>1,500 samples) with a machine-learning algorithm, CIBERSORTx<sup>53</sup>. When we  
251 compared epithelial, immune, and stromal cell populations among the CMS subtypes, we did not  
252 detect a distinct pattern of tumor, immune, or stromal cell signatures across the different CMS  
253 subtypes. Each CMS subtype was enriched in these cell types in varying proportions but without  
254 a clear distinction between the four subtypes, suggesting a lack of clear separation among the  
255 CMS subsets at the single-cell resolution (**Fig. 5a-b**). Upon analysis of four independent bulk RNA  
256 datasets, there was significant discordance in terms of cell phenotype enrichment with respect  
257 to each CMS subtype across the datasets except CMS4 which had predominant stromal  
258 enrichment (**Supplementary Figs. 8-11**)<sup>54</sup>. These discordant results could be due to intra-patient  
259 CMS heterogeneity, intratumoral variation in tumor purity, stromal and immune cell infiltration,  
260 and CMS's inability to address tumor/TME-to-tumor/TME variability, among others<sup>16</sup>. Thus, novel  
261 approaches that consider these factors are required to stratify patients for optimal biomarker and  
262 therapeutic development.

263  
264 Based on the above findings, we postulate that CRC is more accurately represented in a  
265 transcriptomic continuum previously proposed by Ma et al.<sup>55</sup>. The authors analyzed bulk  
266 transcriptomic data using a novel computational framework in which denovo, unsupervised  
267 clustering methods (k-medoid, non-negative-matrix factorization, and consensus clustering)  
268 demonstrated the existence of CRC in a transcriptomic continuum<sup>56-58</sup>. They further carried out  
269 principal component analysis and robustly validated two principal components, PC Cluster  
270 Subtype Scores 1 and 2 (PCSS1 and PCSS2, respectively). We reasoned that using single-cell  
271 data could deepen our understanding of how each cell phenotype contributes to the CRC tumor  
272 microenvironment using continuous scores that inform CRC diversity beyond binning CRC into  
273 traditional classifications.



274

275 We evaluated every cell fraction (epithelial, stromal, and immune components) from our data  
276 with the Ma et al. algorithm on eight pooled bulk transcriptomic datasets, focusing on PCSS1  
277 and PCSS2, since these were validated in the original study (**Fig. 5c-d**). On projecting single-  
278 cell expression profiles on quadrants corresponding to each of the four CMS, we noted a lack of  
279 separation of all cell phenotypes between CMS subtypes suggesting that CRC exists in a  
280 transcriptomic continuum<sup>55</sup>.

281

282 To test continuous scores reproducibility, we analyzed four bulk transcriptomic datasets  
283 separately; we found that transcriptional shifts were reproducible across datasets for all major cell  
284 types (**Supplementary Figs. 8-11**). The continuous scores showed no reliability in classifying  
285 CRC into immune–stromal rich (CMS1/CMS4) or immune-stromal desert (CMS2/CMS3) subtypes  
286 as proposed previously<sup>21</sup>. Thus, confirming continuous scores rather than discrete subtypes may  
287 improve classifying CRC tumors and may explain tumor-to-tumor variability, tumor/TME-to-  
288 tumor/TME and TME-to-TME variabilities<sup>55</sup>. Of note, CAF-S1 exhibited high PCSS1 and PCSS2  
289 scores across independent datasets, correlating with the CMS4 subtype. Thus, our analysis  
290 identified CAF-S1 as a cell of origin for biological heterogeneity in CMS4 subtypes associated  
291 with poor prognosis (**Supplementary table 5**).

292

## 293 **DISCUSSION**

294 In the present study, we evaluated the CMS classification of CRC that have been developed by  
295 bulk RNA-seq through single-cell resolution transcriptomic analysis. We find that stromal cells  
296 engender a more significant contribution to biological heterogeneity. Although previous studies  
297 employing bulk transcriptomics have demonstrated that the degree of stromal infiltration is  
298 associated with prognosis and a small scRNAseq study utilizing 26 fibroblasts demonstrated poor  
299 survival among CAF-enriched CRC tumors especially the CMS4 subtype. Here, using much larger

300 sample set of 1,182 high-quality fibroblasts, we identify the CAF-S1 subtype to be the cell of origin  
301 associated with poor prognosis across all CRC CMS subtypes and not just CMS4<sup>59</sup>. Further, we  
302 developed a novel signature of CAF infiltration and demonstrate that CMS4 can be stratified into  
303 risk groups associated with good or poor median overall survival. These findings are significant  
304 since the CMS4 subtype, is primarily stromal-driven and is enriched in more than 40% of  
305 metastatic CRC samples from patients with worse outcomes<sup>22</sup>. We also identified CAF-S1  
306 subtypes associated with certain biological functions in other cancers, including the *ecm-myCAF*  
307 and *TGFβ-myCAF* subtypes (responsible for immunotherapy resistance in NSCLC and  
308 melanoma), and CAF-S4s known to play a role in inducing cancer cell invasion<sup>49,50</sup>. Thus,  
309 targeting CAFs to remodel the tumor microenvironment may lead to improved and much-needed  
310 therapeutic development for metastatic CRC patients<sup>22,23</sup>.

311  
312 Targeting of CAFs in solid tumors is being explored in multiple clinical trials with variable results<sup>60-</sup>  
313 <sup>62</sup>. Such studies likely failed to address CAF heterogeneity and their complex interactions with the  
314 other cells of TME. Our study suggests that CRC may be intricately entwined with the stroma,  
315 and therefore may be amenable to stromal targeted combinatoric approaches, including  
316 monoclonal antibodies that abrogate CAF-S1 function. In future studies, the treatment of CRC  
317 patients should involve stroma targeted therapies and take the above aspects into  
318 consideration<sup>60,63</sup>. The scRNA-seq or bulk-RNA-seq signatures corresponding to CAF-S1 and  
319 CAF-S4 may serve as suitable biomarkers for tumors that are reliant on this axis. Immunotherapy  
320 responses in MSS CRC, which comprise almost 95% of metastatic CRC, are lacking; CAF  
321 subpopulations within the TME may be suppressing immune responses in these tumors<sup>64</sup>. Based  
322 on our analysis, we speculate that targeting CAF-derived chemokines and cytokines via  
323 biospecific antibodies, vaccines, or even cell-based therapies, may enhance current checkpoint  
324 blockade strategies<sup>60</sup>. Functional validation and clinical studies will be required to confirm the  
325 clinical utility of targeting these CAF populations in CRC.

326

327 More importantly, our study's single-cell resolution enables us to investigate whether tumor cell  
328 transcriptomes, and by extension, biological phenotypes, are the primary determinant of CMS  
329 classification. Based on our findings, it appears that bulk analysis may have been confounded by  
330 varying tumor microenvironment population enrichment, and that tumor cells within each patient  
331 do not segregate into static phenotypes but rather exhibit considerable plasticity. In contrast, the  
332 single-cell analysis uncovered the complex and mixed cellular-phenotypes among each cell  
333 specific subpopulation, which projected in a transcriptomic continuum across CMS subtypes.  
334 These findings were further supported by scRNA-seq CMS classification analysis that assigned  
335 each CRC sample to multiple CMS subtypes thereby suggesting CMS heterogeneity in each CRC  
336 tumor<sup>21,65</sup>. These findings may also explain why CMS-defined populations of tumors have not  
337 been readily observed in transcriptomic data from independent CRC cohorts<sup>22,54</sup>. Our data  
338 indicate that attempts to divide CRC phenotypes into the current discrete subtypes may  
339 undermine optimal patient stratification in the clinical trial setting. Intriguingly, by applying two  
340 independent algorithms, we demonstrate that CRC tumors and their ecosystems exist in a  
341 transcriptomic continuum and not only show tumor-to-tumor variability (as proposed by Ma et al.)  
342 but also demonstrate tumor/TME-to-tumor/TME transcriptional variability at the single-cell  
343 resolution<sup>55</sup>. The continuous scores are reproducible across transcriptomic datasets, thus  
344 allowing robust identification of patient subtypes. This may help to optimize CRC treatment in  
345 future studies.

346

347 In conclusion, our study lends strong support to the tumor biology models proposed by Ma et al.  
348 (and other groups) and represents a conceptual shift in our understanding of CRC pathogenesis,  
349 clinical management, and therapeutic development. Future studies will need to consider tumor-  
350 TME to tumor-TME heterogeneity which will be critical for optimizing biomarkers and treatment  
351 strategies for CRC.

352

### 353 **ACKNOWLEDGEMENTS**

354 This study was supported by the startup fund provided to A.M. by the Rush University Medical  
355 Center; the OCM grant to A.M by Rush University Cancer Center. Part of A.H.'s time was  
356 supported by a Merit Review Award (I01 BX000545) from the Medical Research Service,  
357 Department of Veterans Affairs. We would also like to thank Dr. Levi Waldron for sharing code  
358 from his publication entitled, "Continuity of transcriptomes among colorectal cancer subtypes  
359 based on meta-analysis." Above all we want to thank our patients who participated in this study  
360 and their families.

361

### 362 **AUTHOR CONTRIBUTIONS**

363 A.M. devised, supervised the study, and wrote the manuscript. A.M.K. performed data analyses,  
364 wrote the manuscript, and created figures. Z.K. performed data analyses and wrote the  
365 manuscript. M.W.G. aided in analysis, wrote the manuscript, and generated figures. A.S.  
366 supervised study and wrote manuscript. C.E. and S.S.T. helped with bulk transcriptomic analysis.  
367 D.M.H, H.R.G., A.R.B helped with sample collection. All other authors contributed substantially  
368 to data interpretation, and manuscript editing. All authors read and approved this manuscript.

369

### 370 **CODE AVAILABILITY**

371 The code generated and utilized in the completion of this publication will be available in a Github  
372 repository specific to this project.

373

### 374 **DATA AVAILABILITY**

375 Sequencing data deposition is currently in progress. Ten bulk transcriptomic datasets were  
376 accessed from the Gene Expression Omnibus (GEO) database  
377 (<https://www.ncbi.nlm.nih.gov/geo/>).

378

379 **COMPETING INTERESTS**

380 A.M. and J.A.B. received research funding from Tempus lab.

381 A.S. receives research funding from Bristol-Myers Squibb; Merck KGaA, Pierre Fabre. Further,

382 A.S. holds patent PCT/IB2013/060416, '*Colorectal cancer classification with differential prognosis*

383 *and personalized therapeutic responses*' and patent number 2011213.2 '*Prognostic and*

384 *Treatment Response Predictive Method.*'

385 **METHODS**

386

387 ***Patient and tissue sample collection.*** Patients with resectable untreated CRC who underwent  
388 curative colon resection at Rush University Medical Center (Chicago, IL, USA) were included in  
389 this Institutional Review Board (IRB)-approved study. CRC specimens from 16 patients including  
390 nine Caucasian, six African American and one Asian patient with corresponding 8 adjacent normal  
391 tissue samples were processed immediately after collection at Rush University Medical Center  
392 Biorepository and sent for scRNA-seq. Thus our scRNA-seq atlas represent diverse patient  
393 population. The study was conducted in accordance with ethical standards and all patients  
394 provided written informed consent.

395

396 ***Droplet based scRNA-seq - 10× library preparation and sequencing.*** Single-cell RNA  
397 sequencing (scRNA-seq) was performed using 10X Genomics Single Cell 5' Platform. Tumors  
398 and non-malignant samples were enzymatically dissociated (*Miltenyi*), filtered through a 70-  
399 micron cell strainer, pelleted after centrifugation at 300 xg and resuspended in DAPI-FACS buffer  
400 (PBS, 0.04% BSA). Samples were sorted and viable singlets were gated on the basis of scatter  
401 properties and DAPI exclusion. Approximately 3000 cells were pelleted and resuspended in PBS,  
402 and cells underwent single cell droplet-based capture on 10X Chromium instruments according  
403 to the 10X Genomics Single Cell 5' Platform protocol. Transcriptome libraries post-fragmentation,  
404 end-repair, and A-tailing double-sided size selection, and subsequent adaptor ligation also  
405 followed the manufacturer's protocol. Illumina *NextSeq 550* was used for library sequencing and  
406 data were mapped and counted using Cellranger-v3.1.0 (*GRCh38/hg38*).

407

408 ***scRNA-seq data quality control, gene-expression quantification, dimensionality reduction,***  
409 ***and identification of cell clusters.*** *Cell Ranger* was utilized to process the raw gene expression  
410 matrices per samples and all samples from multiple patients were combined in R package (v3.6.3

411 2020-02-29] -- "*Holding the Windssock*"). Seurat package (v3.2.2) was used in this integrative  
412 multimodal analysis<sup>66</sup>. Genes detected in fewer than three cells and cells expressing less than  
413 200 detected genes were filtered out and excluded from analysis. In addition, cells expressing >  
414 25% mitochondria were removed. Cell cycle scoring was performed, (for the S phase and the  
415 G2M phase) and the predicted cell cycle phases were calculated. Doublet detection and any  
416 higher-order multiplets that were not dissociated during sample preparation were removed via  
417 the *DoubletFinder* (v2.0.2) package using default settings<sup>67</sup>. Following quality control one non-  
418 malignant colon sample (B-cac13) was discarded due to poor data quality. Finally, 49,859 cells  
419 remained and were utilized for downstream analysis.

420 We adopted the general protocol described in Stuart et al. (2019) to group single cells into different  
421 cell subsets<sup>66</sup>. We employed the following steps: clustering the cells within each compartment  
422 (including the selection of variable genes for each dataset based on a variance stabilizing  
423 transformation [VST]), canonical correlation analysis (CCA) to remove batch effects among the  
424 samples, reduction of dimensionality, and projection of cells onto graphs<sup>68,69</sup>. Principal  
425 component analysis (PCA) was carried out on the scaled data of highly variable genes<sup>70</sup>. The first  
426 30 principal components (PCs) were used to cluster the cells and to perform a subtype analysis  
427 by nonlinear dimensionality reduction (t-SNE) and to construct Uniform Manifold Approximation  
428 and Projection (UMAP) for cell embeddings<sup>71,72</sup>. We identified cell clusters under the optimal  
429 resolution by a shared nearest neighbor (SNN) modularity optimization-based clustering method.  
430 We implemented the *FindClusters* function of the Seurat package, which first calculated *k-nearest*  
431 *neighbors* and constructed the SNN graph. We implemented the original *Louvain algorithm*  
432 (algorithm = 1) for modularity optimization. Additionally, we utilized Clustree (v0.4.3) and manual  
433 review for identifying the best clustering resolution<sup>25</sup>.

434

435 ***Major cell type detection and data visualization.*** To identify all major cell types, we evaluated  
436 differentially expressed markers in each identity cell group by comparing them to other clusters

437 using the Seurat *FindAllMarkers* function. We used positively expressed genes with an average  
438 expression of  $\geq 2$ -fold higher in that subcluster than the average expression in the rest of the  
439 other subclusters. We used known marker genes, which have the highest fold expression in that  
440 cluster with respect to the other clusters. We also utilized SingleR ((v0.99.10, R Package), which  
441 leverage large transcriptomic datasets of well-annotated cell types and manual annotation for  
442 cell-type identification<sup>32,73–75</sup>. Depending on the presence of known marker genes the clusters  
443 were grouped as: epithelial cells (*EPCAM*, *KRT8*, and *KRT18*), fibroblasts (*COL1A1*, *DCN*,  
444 *COL1A2*, and *C1R*), endothelial cells (*CLDN5*, *FLT1*, *CDH5*, and *RAMP2*), myeloid cells (*LYZ*,  
445 *MARCO*, *CD68*, and *FCGR3A*), CD4 T cells (*CD4*), CD8 T cells (*CD8A* and *CD8B*), and B cells  
446 (*MZB1*),<sup>32,48,73,76–80</sup>. The cells were eventually assembled into DGE matrices within each  
447 compartment, containing all six cell types.

448

449 **Major-cell type subclustering and data visualization.** Each major cell type, including epithelial  
450 cells, endothelial cells, T cells, B cells, myeloid cells, and fibroblasts was reclustered and  
451 reanalyzed to study each compartment at a higher resolution to detect granular cellular  
452 heterogeneity in CRC. Clustree (v0.4.3) and manual review were utilized for optimal cluster  
453 detection. For cell annotation of each cell type, we utilized published literature gene expression  
454 signatures and manual review of differential genes among clusters. Additionally, we again utilized  
455 SingleR (v0.99.10, R Package) for unbiased cell annotation. Interestingly, reclustered of major  
456 compartments individually also detected clusters expressing hybrid markers as well as cell  
457 clusters expressing markers from distinct lineages (such as T cell clusters expressing B cells);  
458 these were removed and excluded for further analysis. We utilized UMAP for visualization  
459 purposes. For validation, we analyzed 65,362 cells from 23 patients and applied the same quality  
460 control metrics as outlined above, retaining 31,383 high-quality single cells for further analysis<sup>30</sup>.  
461 These high-quality cells were analyzed utilizing the same pipelines and parameters as that for our  
462 primary cohort (**Supplementary Figs. 4-5 and 12-13**).



463 The InferCNV (v1.2.1) package was used with default paramets to identify the evidence for  
464 somatic large-scale chromosomal copy number alteration in epithelial cells (*EPCAM+*, *KRT8+*,  
465 *KRT18+*)<sup>81</sup>. Non-malignant epithelial cells were used as the control group.

466

467 **Trajectory analysis.** We used Monocle v.2 (v2.14.0), a reverse graph embedding method to  
468 reconstruct single-cell trajectories in tumor and non-malignant epithelium<sup>82</sup>. In brief, we used UMI  
469 count matrices and the `negbinomial.size()` parameter to create a *CellDataSet* object in the default  
470 setting. We grouped projected cells on UMAP in default settings for visualization of monocle  
471 results. We defined the cumulative duration of the trajectory to show the average amount of  
472 transcriptional transition that a cell undergoes as it passes from the starting state to the end state.  
473 The cells were also ordered in pseudotime to explain the transition of cells from one state to  
474 another.

475

476 **Pathway- Gene set variation analysis (GSVA).** Pathway analysis was performed on the 50  
477 hallmark gene sets downloaded from *Molecular Signatures Database (v7.2)*. We used GSVA  
478 (v1.34.0), a non-parametric, unsupervised method to estimate the gene set variations and  
479 evaluation of pathway enrichment, and pathway scores were calculated for each cell using  
480 standard settings<sup>34,39</sup>.

481

482 **DNA and bulk RNA library construction.** DNA and bulk RNA sequencing was performed as  
483 previously described<sup>83</sup>. One hundred nanograms of DNA from each tumor was mechanically  
484 sheared to an average size of 200 bp. Using the *KAPA Hyper Prep Pack*, DNA libraries were  
485 packed, hybridized into the *xT probe* package, and amplified with the *KAPA HiFi HotStart*  
486 *ReadyMix*. For uniformity, each sample needed to have 95% of all targeted base pairs sequenced  
487 to a minimum depth of 300x. One hundred nanograms of RNA per tumor sample was heat  
488 fragmented to a mean size of 200 base pairs in the presence of magnesium. Using random

489 primers, the RNA was used for first-strand cDNA synthesis, followed by second-strand synthesis  
490 and A-tailing, adapter ligation, bead-based cleanup, and amplification of the library. After library  
491 planning, the *IDT xGEN Exome Test Panel* was hybridized with samples. Streptavidin-coated  
492 beads and target recovery were carried out, accompanied by amplification using the *KAPA HiFi*  
493 library amplification package. The RNA libraries were sequenced on an *Illumina HiSeq 4000* using  
494 patterned flow cell technology to achieve at least 50 million reads.

495

496 ***Detection of somatic variation on DNA sequencing data.*** The tumor and normal FASTQ files  
497 were paired. For quality management measurement, FASTQ files were evaluated using FASTQC  
498 and matched with Novoalign (Novocraft, Inc.)<sup>83,84</sup>. SAM files were generated and converted to  
499 BAM files. The BAM files were sorted, and duplicates were marked. Single nucleotide variations  
500 (SNVs) were called after alignment and sorting. For discovery of copy number alterations, the de-  
501 duplicated BAM files and the VCF generated from the variant calling pipeline were processed to  
502 compute read depth and variance of heterozygous germline SNVs between the tumor sample  
503 and normal sample. Binary circular segmentation was introduced and segments with strongly  
504 differential  $\log_2$  ratios between the tumor and its comparator were chosen. From a combination of  
505 differential coverage in segmented regions and estimation of stromal admixture provided by  
506 analysis of heterozygous germline SNVs, an estimated integer copy number was determined

507

508 ***Microsatellite instability status.*** Probes for 43 microsatellite regions were developed using  
509 *Tempus xT* assay<sup>83</sup>. Tumors were categorized into three groups by the MSI classification  
510 algorithm as described by Tempus: microsatellite instability-high (MSI-H), microsatellite stable  
511 (MSS) or microsatellite equivocal (MSE). MSI screening for paired tumor-normal patients used  
512 reads mapped to the microsatellite loci with at least 5 bps flanking the microsatellite. The sample  
513 was graded as MSI-H if there was a >70% chance of MSI-H classification. If the likelihood of MSI-  
514 H status was 30-70%, the test findings were too ambiguous to interpret and those samples were

515 listed as MSE. If there was a <30% chance of MSI-H status, the sample was called MSS.  
516 Additionally, IHC results were used to classify tumors into MSS or MSI molecular subtypes. Both  
517 of these modalities were concordant and produced the same results.

518

519 ***Bulk RNA-seq and microarray analysis.*** We downloaded and pooled eight colorectal gene  
520 expression datasets (GSE13067<sup>85</sup>, GSE13294<sup>85</sup>, GSE14333<sup>86</sup>, GSE17536<sup>87</sup>, GSE20916<sup>88</sup>,  
521 GSE33113<sup>89</sup>, GSE35896<sup>90</sup>, and GSE39582<sup>14</sup>), a pancreatic cancer dataset (GSE62165<sup>91</sup>) and  
522 a non-small cell lung cancer dataset (GSE33532<sup>92</sup>) to validate our findings from the single cell  
523 compartments by deconvoluting the bulk gene expression profiles into pseudo single-cell  
524 resolutions. We used Affy (v1.64.0) for the data analysis and for exploration of Affymetrix  
525 oligonucleotide array probe level data<sup>93</sup>. Batch correction was carried out using the  
526 removeBatchEffect (v3.42.2) function of the LIMMA program and CMScaller for the CMS  
527 classification (see below)<sup>94</sup>. Three datasets (GSE17536<sup>87</sup>, GSE33113<sup>89</sup>, and GSE39582<sup>14</sup>) were  
528 utilized for clinical outcome analysis<sup>94,95</sup>.

529

530 ***Correlation patterns in bulk gene expressions for CAF compartments.*** To identify the top  
531 correlated CAF-marker genes within the combined eight and individual four bulk gene expression  
532 sets, we first transformed the bulk gene expression sets with log<sub>2</sub> transformation. Next, marker  
533 genes with an average log<sub>2</sub> FC >= 0.5 and p < 0.05 obtained from the SC analysis of CAF-S1 and  
534 CAF-S4 compartments were separately intersected with the bulk gene expression sets. Genes  
535 with an average Spearman correlation score greater than 0.8 were kept as the CAF signatures  
536 within the bulk gene expression. Heatmaps illustrating the correlation patterns within and between  
537 the CAF compartments were prepared with the heatmap.2 function from ggplot package (v3.1.1)  
538 utilizing the Pearson correlation coefficient. Heatmaps illustrating the correlation patterns within  
539 and between the CAF compartments were prepared using the ggplot package (v3.1.1) utilizing  
540 the Pearson correlation coefficient<sup>96</sup>.

541

542 The Cox proportional hazard regression model was used to examine the significance of 20 cell  
543 types from scRNA-seq in bulk expression data. Each cell type's marker genes with an average  
544  $\log_{2}FC > 1$  and adjusted  $P < 0.05$  were intersected with the bulk expression datasets separately. We  
545 only kept the marker genes with a high correlation with each other in bulk, which provides an  
546 average correlation score of  $> 0.8$ . The average bulk expression of each cell type's remaining  
547 marker genes was calculated and used in the hazard regression model as the representative of  
548 this cell type. For analysis of relationships with patient outcome, univariate models were  
549 calculated using Cox proportional hazard regression (coxph function from survival R package)<sup>97</sup>.

550

551 ***Deconvoluting public bulk gene expression profiles into pseudo single-cell expressions.***

552 We used CIBERSORTx v1 to estimate composition of various cell populations in pooled eight  
553 microarray datasets<sup>53</sup>. Signature gene matrices were created using the expression profiles of  
554 49,859 cells as the reference single cell profile. We ran the 'hires' module with default parameters  
555 except for the 'rmbatchBmode,' and the bulk-mode batch correction argument was set to true.  
556 After the deconvolution process, we normalized the gene expressions according to the cell  
557 fractions in each sample and calculated each gene's Z-transformed expression values. The  
558 average normalized expression of each cell type across all samples was plotted with the  
559 heatmap.3 R function of the GMD package (v0.3.3)<sup>98</sup>. A signature matrix highlighting marker  
560 genes of the different cell types was prepared with a heatmap.2 R function of ggplot (v3.1.1). We  
561 also applied the same parameters to deconvolute GSE14333<sup>86</sup>, GSE17536<sup>87</sup>, GSE33113<sup>89</sup>, and  
562 GSE39582<sup>14</sup> datasets individually.

563

564 ***Consensus molecular subtyping of colorectal cancer (CMS Classification).*** We used R

565 package CMScaller(v0.9.2), a nearest template prediction (NTP) algorithm, for the classification  
566 of gene expression datasets<sup>95</sup>. We set the permutation number to 1000 to predict the CMS classes

567 of the samples in the GEO datasets with a p-value < 0.05. We ran CMScaller with default  
568 parameters.

569

570 **Continuous subtype discovery using scRNA-seq analysis.** Bulk mRNA expression profiles of  
571 the combined and batch adjusted eight GEO datasets (GSE13067<sup>85</sup>, GSE13294<sup>85</sup>, GSE14333<sup>86</sup>,  
572 GSE17536<sup>87</sup>, GSE20916<sup>88</sup>, GSE33113<sup>89</sup>, GSE35896<sup>90</sup>, and GSE39582<sup>14</sup>), composed of 1584  
573 samples in total, were deconvoluted into the pseudo single-cell expression profiles via  
574 CIBERSORTx utilizing the expression data consisting of 20 different cell types from our scRNA-  
575 seq dataset<sup>53</sup>. We transformed the deconvoluted expression matrix with log<sub>2</sub> transformation. The  
576 principal components cluster subtype scores (PCSSs) of the CMS subtypes among the 1584  
577 samples, were determined separately for each cell type using an algorithm published by Ma et  
578 al<sup>55</sup>. To obtain the PCSSs, the average loading vectors were used. The results obtained for 20  
579 cell types were projected on the first two PCSSs (PCSS1 and PCSS2) as they were validated by  
580 Ma et al. in their analysis using 18 datasets. We also analyzed four datasets (GSE14333<sup>86</sup>,  
581 GSE17536<sup>87</sup>, GSE33113<sup>89</sup>, and GSE39582<sup>14</sup>) to independently confirm reproducibility of  
582 continuous scores.

583

584 **Statistics and reproducibility.** All statistical analyses and graphs were created in R (v3.6.3) and  
585 using a Python-based computational analysis tool. Schematic representations were made using  
586 the Inkscape (<https://inkscape.org/>) software. Dim plots, bar plots and box plots were generated  
587 using the dittoSeq (v1.1.7) package with default parameters<sup>99</sup>. Violin plots were generated using  
588 the patchwork (v1.1.0) package and ggplot2 (v3.3.2) package in R with default parameters.  
589 Heatmaps were generated using Morpheus.R with default parameters<sup>100,101</sup>. ANOVA and pair-  
590 wised t-tests for the CMS classes across the deconvoluted expression profiles were performed in  
591 R using the ggpubr R (v0.4.0) package<sup>102</sup>. The Box and Whisker plots were generated using the  
592 boxplot function of the R base package at default parameters. The mean of the log<sub>2</sub> transformed

593 deconvoluted expression value of the samples in each CMS group was demonstrated with a  
594 horizontal straight line within each box. The length of a boxplot corresponds to the interquartile  
595 range (IQR), which is defined as the range between the first and third quartiles (Q1 and Q3),  
596 whereas the whiskers are the upper and lower extreme values of the data (either data's extremum  
597 values, or the  $Q3+1.5*IQR$  and  $Q1-1.5*IQR$  values, whichever was less extreme).

598

599 **Survival analysis.** Survival curves were obtained according to the Kaplan-Meier method survfit  
600 (v3.2-7), and differences between survival distributions were assessed by Log-rank test. The  
601 patients were divided into two groups (high/poor and low/good risk) according to their median  
602 expression values (survminer (v0.4.8)). The surv\_cutpoint function uses the maximally selected  
603 rank statistics and implements standard methods for the approximation of the null distribution of  
604 maximally selected rank statistics (maxstat (v0.7-25)).

605

606 The proportional hazard assumption was tested to examine the fit of the model for survival of the  
607 samples in four GEO datasets (GSE14333<sup>86</sup>, GSE17536<sup>87</sup>, GSE33113<sup>89</sup>, and GSE39582<sup>14</sup>) with  
608 respect to the deconvoluted bulk mRNA expressions. For analysis of the relationships with patient  
609 outcome, multivariate models were calculated using the Cox proportional hazard regression  
610 (coxph survival R package)<sup>97</sup>.

611

612

613

614

615

616

617

618



619 **REFERENCES**

- 620
- 621 1. Cancer of the Colon and Rectum - Cancer Stat Facts. *SEER*
- 622 <https://seer.cancer.gov/statfacts/html/colorect.html>.
- 623 2. Arnold, M. *et al.* Global patterns and trends in colorectal cancer incidence and mortality. *Gut*
- 624 **66**, 683–691 (2017).
- 625 3. Osterman, E. *et al.* Recurrence risk after radical colorectal cancer surgery—less than
- 626 before, but how high is it? *Cancers* **12**, 3308 (2020).
- 627 4. Molinari, C. *et al.* Heterogeneity in colorectal cancer: a challenge for personalized medicine?
- 628 *Int J Mol Sci* **19**, (2018).
- 629 5. Xie, Y.-H., Chen, Y.-X. & Fang, J.-Y. Comprehensive review of targeted therapy for
- 630 colorectal cancer. *Signal Transduction and Targeted Therapy* **5**, 1–30 (2020).
- 631 6. Budinska, E. *et al.* Gene expression patterns unveil a new level of molecular heterogeneity
- 632 in colorectal cancer. *J Pathol* **231**, 63–76 (2013).
- 633 7. Deschoolmeester, V. *et al.* Tumor infiltrating lymphocytes: an intriguing player in the survival
- 634 of colorectal cancer patients. *BMC Immunol* **11**, 19 (2010).
- 635 8. Lee, W.-S., Park, S., Lee, W. Y., Yun, S. H. & Chun, H.-K. Clinical impact of tumor-
- 636 infiltrating lymphocytes for survival in stage II colon cancer. *Cancer* **116**, 5188–5199 (2010).
- 637 9. Perez, E. A. *et al.* Association of stromal tumor-infiltrating lymphocytes with recurrence-free
- 638 Survival in the N9831 adjuvant trial in patients with early-stage HER2-positive breast
- 639 cancer. *JAMA Oncology* **2**, 56–64 (2016).
- 640 10. Nearchou, I. P. *et al.* Spatial immune profiling of the colorectal tumor microenvironment
- 641 predicts good outcome in stage II patients. *npj Digital Medicine* **3**, 1–10 (2020).
- 642 11. Pagès, F. *et al.* International validation of the consensus Immunoscore for the classification
- 643 of colon cancer: a prognostic and accuracy study. *The Lancet* **391**, 2128–2139 (2018).
- 644 12. The Cancer Genome Atlas Network. Comprehensive molecular characterization of human
- 645 colon and rectal cancer. *Nature* **487**, 330–337 (2012).
- 646 13. Sadanandam, A. *et al.* A colorectal cancer classification system that associates cellular
- 647 phenotype and responses to therapy. *Nature Medicine* **19**, 619–625 (2013).
- 648 14. Marisa, L. *et al.* Gene Expression Classification of Colon Cancer into Molecular Subtypes:
- 649 Characterization, Validation, and Prognostic Value. *PLOS Medicine* **10**, e1001453 (2013).
- 650 15. Guinney, J. *et al.* The consensus molecular subtypes of colorectal cancer. *Nature Medicine*
- 651 **21**, 1350–1356 (2015).
- 652 16. Roepman, P. *et al.* Colorectal cancer intrinsic subtypes predict chemotherapy benefit,
- 653 deficient mismatch repair and epithelial-to-mesenchymal transition. *International Journal of*
- 654 *Cancer* **134**, 552–562 (2014).
- 655 17. Berg, I. van den *et al.* Improving clinical management of colon cancer through
- 656 CONNECTION, a nation-wide colon cancer registry and stratification effort (CONNECTION
- 657 II trial): rationale and protocol of a single arm intervention study. *BMC Cancer* **20**, 1–8
- 658 (2020).
- 659 18. Lenz, H.-J. *et al.* Impact of Consensus Molecular Subtype on Survival in Patients With
- 660 Metastatic Colorectal Cancer: Results From CALGB/SWOG 80405 (Alliance). *J Clin Oncol*
- 661 **37**, 1876–1885 (2019).
- 662 19. Stintzing, S. *et al.* Consensus molecular subgroups (CMS) of colorectal cancer (CRC) and
- 663 first-line efficacy of FOLFIRI plus cetuximab or bevacizumab in the FIRE3 (AIO KRK-0306)
- 664 trial. *Ann Oncol* **30**, 1796–1803 (2019).
- 665 20. Mooi, J. K. *et al.* The prognostic impact of consensus molecular subtypes (CMS) and its
- 666 predictive effects for bevacizumab benefit in metastatic colorectal cancer: molecular
- 667 analysis of the AGITG MAX clinical trial. *Ann Oncol* **29**, 2240–2246 (2018).
- 668 21. Sveen, A., Cremolini, C. & Dienstmann, R. Predictive modeling in colorectal cancer: time to
- 669 move beyond consensus molecular subtypes. *Annals of Oncology* **30**, 1682–1685 (2019).

- 670 22. Fontana, E., Eason, K., Cervantes, A., Salazar, R. & Sadanandam, A. Context matters—  
671 consensus molecular subtypes of colorectal cancer as biomarkers for clinical trials. *Annals*  
672 *of Oncology* **30**, 520–527 (2019).
- 673 23. Khambata-Ford, S. *et al.* Expression of epiregulin and amphiregulin and K-ras mutation  
674 status predict disease control in metastatic colorectal cancer patients treated with  
675 cetuximab. *J Clin Oncol* **25**, 3230–3237 (2007).
- 676 24. Aderka, D., Stintzing, S. & Heinemann, V. Explaining the unexplainable: discrepancies in  
677 results from the CALGB/SWOG 80405 and FIRE-3 studies. *The Lancet Oncology* **20**, e274–  
678 e283 (2019).
- 679 25. Zappia, L. & Oshlack, A. Clustering trees: a visualization for evaluating clusterings at  
680 multiple resolutions. *Gigascience* **7**, (2018).
- 681 26. Zhang, L. *et al.* Single-cell analyses inform mechanisms of myeloid-targeted therapies in  
682 colon cancer. *Cell* **181**, 442–459.e29 (2020).
- 683 27. Zhang, L. *et al.* Lineage tracking reveals dynamic relationships of T cells in colorectal  
684 cancer. *Nature* **564**, 268–272 (2018).
- 685 28. Corridoni, D. *et al.* Single-cell atlas of colonic CD8 + T cells in ulcerative colitis. *Nature*  
686 *Medicine* **26**, 1480–1490 (2020).
- 687 29. Oh, D. Y. *et al.* Intratumoral CD4+ T Cells Mediate Anti-tumor Cytotoxicity in Human  
688 Bladder Cancer. *Cell* **181**, 1612–1625.e13 (2020).
- 689 30. Lee, H.-O. *et al.* Lineage-dependent gene expression programs influence the immune  
690 landscape of colorectal cancer. *Nature Genetics* **52**, 594–603 (2020).
- 691 31. Mills, J. C. & Sansom, O. J. Reserve stem cells: Differentiated cells reprogram to fuel repair,  
692 metaplasia, and neoplasia in the adult gastrointestinal tract. *Sci Signal* **8**, re8 (2015).
- 693 32. Lambrechts, D. *et al.* Phenotype molding of stromal cells in the lung tumor  
694 microenvironment. *Nat Med* **24**, 1277–1289 (2018).
- 695 33. Izar, B. *et al.* A single-cell landscape of high-grade serous ovarian cancer. *Nature Medicine*  
696 **26**, 1271–1279 (2020).
- 697 34. Liberzon, A. *et al.* The Molecular Signatures Database (MSigDB) hallmark gene set  
698 collection. *Cell Syst* **1**, 417–425 (2015).
- 699 35. Jamal-Hanjani, M. *et al.* Tracking the evolution of non-small-cell lung cancer. *N Engl J Med*  
700 **376**, 2109–2121 (2017).
- 701 36. Malikic, S., Jahn, K., Kuipers, J., Sahinalp, S. C. & Beerenwinkel, N. Integrative inference of  
702 subclonal tumour evolution from single-cell and bulk sequencing data. *Nat Commun* **10**,  
703 2750 (2019).
- 704 37. Lim, S. B. *et al.* Addressing cellular heterogeneity in tumor and circulation for refined  
705 prognostication. *Proc Natl Acad Sci U S A* **116**, 17957–17962 (2019).
- 706 38. Wang, R. *et al.* Single-cell dissection of intratumoral heterogeneity and lineage diversity in  
707 metastatic gastric adenocarcinoma. *Nat Med* **27**, 141–151 (2021).
- 708 39. Hänzelmann, S., Castelo, R. & Guinney, J. GSVA: gene set variation analysis for microarray  
709 and RNA-seq data. *BMC Bioinformatics* **14**, 7 (2013).
- 710 40. Sathe, A. *et al.* Single-cell genomic characterization reveals the cellular reprogramming of  
711 the gastric tumor microenvironment. *Clin Cancer Res* **26**, 2640–2653 (2020).
- 712 41. Trapnell, C. *et al.* The dynamics and regulators of cell fate decisions are revealed by  
713 pseudotemporal ordering of single cells. *Nat Biotechnol* **32**, 381–386 (2014).
- 714 42. Qiu, X. *et al.* Reversed graph embedding resolves complex single-cell trajectories. *Nat*  
715 *Methods* **14**, 979–982 (2017).
- 716 43. Dalerba, P. *et al.* Single-cell dissection of transcriptional heterogeneity in human colon  
717 tumors. *Nat Biotechnol* **29**, 1120–1127 (2011).
- 718 44. Vermeulen, L. *et al.* Single-cell cloning of colon cancer stem cells reveals a multi-lineage  
719 differentiation capacity. *PNAS* **105**, 13427–13432 (2008).



- 720 45. Monk, M. & Holding, C. Human embryonic genes re-expressed in cancer cells. *Oncogene*  
721 **20**, 8085–8091 (2001).
- 722 46. Fearon, E. R. & Vogelstein, B. A genetic model for colorectal tumorigenesis. *Cell* **61**, 759–  
723 767 (1990).
- 724 47. Costa, A. *et al.* Fibroblast heterogeneity and immunosuppressive environment in human  
725 breast cancer. *Cancer Cell* **33**, 463–479.e10 (2018).
- 726 48. Bartoschek, M. *et al.* Spatially and functionally distinct subclasses of breast cancer-  
727 associated fibroblasts revealed by single cell RNA sequencing. *Nat Commun* **9**, 5150  
728 (2018).
- 729 49. Kieffer, Y. *et al.* Single-cell analysis reveals fibroblast clusters linked to immunotherapy  
730 resistance in cancer. *Cancer Discov* **10**, 1330–1351 (2020).
- 731 50. Wu, S. Z. *et al.* Stromal cell diversity associated with immune evasion in human triple-  
732 negative breast cancer. *The EMBO Journal* **39**, (2020).
- 733 51. Sadanandam, A. *et al.* Reconciliation of classification systems defining molecular subtypes  
734 of colorectal cancer. *Cell Cycle* **13**, 353–357 (2014).
- 735 52. De Sousa E Melo, F. *et al.* Poor-prognosis colon cancer is defined by a molecularly distinct  
736 subtype and develops from serrated precursor lesions. *Nat Med* **19**, 614–618 (2013).
- 737 53. Newman, A. M. *et al.* Determining cell type abundance and expression from bulk tissues  
738 with digital cytometry. *Nature Biotechnology* **37**, 773–782 (2019).
- 739 54. Dunne, P. D. *et al.* Challenging the cancer molecular stratification dogma: intratumoral  
740 heterogeneity undermines consensus molecular subtypes and potential prognostic value in  
741 colorectal cancer. *Clin Cancer Res* **22**, 4095–4104 (2016).
- 742 55. Ma, S. *et al.* Continuity of transcriptomes among colorectal cancer subtypes based on meta-  
743 analysis. *Genome Biology* **19**, 142 (2018).
- 744 56. Clustering rules: a comparison of partitioning and hierarchical clustering algorithms.  
745 <https://link.springer.com/article/10.1007/s10852-005-9022-1>.
- 746 57. Wilkerson, M. D. & Hayes, D. N. ConsensusClusterPlus: a class discovery tool with  
747 confidence assessments and item tracking. *Bioinformatics* **26**, 1572–1573 (2010).
- 748 58. Gaujoux, R. & Seoighe, C. A flexible R package for nonnegative matrix factorization. *BMC*  
749 *Bioinformatics* **11**, 367 (2010).
- 750 59. Li, H. *et al.* Reference component analysis of single-cell transcriptomes elucidates cellular  
751 heterogeneity in human colorectal tumors. *Nat Genet* **49**, 708–718 (2017).
- 752 60. Liu, T. *et al.* Cancer-associated fibroblasts: an emerging target of anti-cancer  
753 immunotherapy. *J Hematol Oncol* **12**, 86 (2019).
- 754 61. Barnett, R. M. & Vilar, E. Targeted therapy for cancer-associated fibroblasts: are we there  
755 yet? *JNCI: Journal of the National Cancer Institute* **110**, 11–13 (2018).
- 756 62. Gascard, P. & Tlsty, T. D. Carcinoma-associated fibroblasts: orchestrating the composition  
757 of malignancy. *Genes Dev.* **30**, 1002–1019 (2016).
- 758 63. Sahai, E. *et al.* A framework for advancing our understanding of cancer-associated  
759 fibroblasts. *Nat Rev Cancer* **20**, 174–186 (2020).
- 760 64. Roth, A. D. *et al.* Prognostic role of KRAS and BRAF in stage II and III resected colon  
761 cancer: results of the translational study on the PETACC-3, EORTC 40993, SAKK 60-00  
762 trial. *J Clin Oncol* **28**, 466–474 (2010).
- 763 65. Laurent-Puig, P. *et al.* Colon cancer molecular subtype intratumoral heterogeneity and its  
764 prognostic impact: An extensive molecular analysis of the PETACC-8. *Annals of Oncology*  
765 **29**, viii18 (2018).
- 766 66. Stuart, T. *et al.* Comprehensive integration of single-cell data. *Cell* **177**, 1888–1902.e21  
767 (2019).
- 768 67. McGinnis, C. S., Murrow, L. M. & Gartner, Z. J. DoubletFinder: Doublet detection in single-  
769 cell RNA sequencing data using artificial nearest neighbors. *Cell Syst* **8**, 329–337.e4 (2019).

- 770 68. Anders, S. & Huber, W. Differential expression analysis for sequence count data. *Genome*  
771 *Biol* **11**, R106 (2010).
- 772 69. Thompson, B. Canonical correlation analysis. in *Encyclopedia of Statistics in Behavioral*  
773 *Science* (American Cancer Society, 2005). doi:10.1002/0470013192.bsa068.
- 774 70. Jolliffe, I. Principal component analysis. in *International Encyclopedia of Statistical Science*  
775 (ed. Lovric, M.) 1094–1096 (Springer, 2011). doi:10.1007/978-3-642-04898-2\_455.
- 776 71. Maaten, L. van der. Accelerating t-SNE using tree-based algorithms. *Journal of Machine*  
777 *Learning Research* **15**, 3221–3245 (2014).
- 778 72. McInnes, L., Healy, J., Saul, N. & Großberger, L. UMAP: uniform manifold approximation  
779 and projection. *Journal of Open Source Software* **3**, 861 (2018).
- 780 73. Zilionis, R. *et al.* Single-cell transcriptomics of human and mouse lung cancers reveals  
781 conserved myeloid populations across individuals and species. *Immunity* **50**, 1317-  
782 1334.e10 (2019).
- 783 74. Helmink, B. A. *et al.* B cells and tertiary lymphoid structures promote immunotherapy  
784 response. *Nature* **577**, 549–555 (2020).
- 785 75. Guo, X. *et al.* Global characterization of T cells in non-small-cell lung cancer by single-cell  
786 sequencing. *Nat Med* **24**, 978–985 (2018).
- 787 76. Szabo, P. A. *et al.* Single-cell transcriptomics of human T cells reveals tissue and activation  
788 signatures in health and disease. *Nat Commun* **10**, 4706 (2019).
- 789 77. Nirschl, C. J. *et al.* IFN $\gamma$ -dependent tissue-immune homeostasis is co-opted in the tumor  
790 microenvironment. *Cell* **170**, 127-141.e15 (2017).
- 791 78. Kim, N. *et al.* Single-cell RNA sequencing demonstrates the molecular and cellular  
792 reprogramming of metastatic lung adenocarcinoma. *Nat Commun* **11**, 2285 (2020).
- 793 79. Shi, Z. *et al.* More than one antibody of individual B cells revealed by single-cell immune  
794 profiling. *Cell Discov* **5**, 64 (2019).
- 795 80. Ramesh, A. *et al.* A pathogenic and clonally expanded B cell transcriptome in active multiple  
796 sclerosis. *Proc Natl Acad Sci U S A* **117**, 22932–22943 (2020).
- 797 81. Puram, S. V. *et al.* Single-cell transcriptomic analysis of primary and metastatic tumor  
798 ecosystems in head and neck cancer. *Cell* **171**, 1611-1624.e24 (2017).
- 799 82. Qiu, X. *et al.* Single-cell mRNA quantification and differential analysis with Census. *Nat*  
800 *Methods* **14**, 309–315 (2017).
- 801 83. Beaubier, N. *et al.* Clinical validation of the tempus xT next-generation targeted oncology  
802 sequencing assay. *Oncotarget* **10**, 2384–2396 (2019).
- 803 84. Andrews, S. *FastQC: a quality control tool for high throughput sequence data.* (Babraham  
804 Institute, 2012).
- 805 85. Jorissen, R. N. *et al.* DNA copy-number alterations underlie gene expression differences  
806 between microsatellite stable and unstable colorectal cancers. *Clin Cancer Res* **14**, 8061–  
807 8069 (2008).
- 808 86. Jorissen, R. N. *et al.* Metastasis-associated gene expression changes predict poor  
809 outcomes in patients with Dukes stage B and C colorectal cancer. *Clin Cancer Res* **15**,  
810 7642–7651 (2009).
- 811 87. Smith, J. J. *et al.* Experimentally derived metastasis gene expression profile predicts  
812 recurrence and death in patients with colon cancer. *Gastroenterology* **138**, 958–968 (2010).
- 813 88. Skrzypczak, M. *et al.* Modeling oncogenic signaling in colon tumors by multidirectional  
814 analyses of microarray data directed for maximization of analytical reliability. *PLoS One* **5**,  
815 (2010).
- 816 89. Kemper, K. *et al.* Mutations in the Ras-Raf Axis underlie the prognostic value of CD133 in  
817 colorectal cancer. *Clin Cancer Res* **18**, 3132–3141 (2012).
- 818 90. Schlicker, A. *et al.* Subtypes of primary colorectal tumors correlate with response to targeted  
819 treatment in colorectal cell lines. *BMC Med Genomics* **5**, 66 (2012).

- 820 91. Janky, R. *et al.* Prognostic relevance of molecular subtypes and master regulators in  
821 pancreatic ductal adenocarcinoma. *BMC Cancer* **16**, 632 (2016).
- 822 92. Meister, M. *et al.* Intra-tumor heterogeneity of gene expression profiles in early stage non-  
823 small cell lung cancer. *Journal of Bioinformatics Research Studies* **1**, (2014).
- 824 93. Gautier, L., Cope, L., Bolstad, B. M. & Irizarry, R. A. affy—analysis of Affymetrix GeneChip  
825 data at the probe level. *Bioinformatics* **20**, 307–315 (2004).
- 826 94. Ritchie, M. E. *et al.* limma powers differential expression analyses for RNA-sequencing and  
827 microarray studies. *Nucleic Acids Res* **43**, e47 (2015).
- 828 95. Eide, P. W., Bruun, J., Lothe, R. A. & Sveen, A. CMScaller: an R package for consensus  
829 molecular subtyping of colorectal cancer pre-clinical models. *Sci Rep* **7**, 16618 (2017).
- 830 96. Wickham, H. *ggplot2*. (Springer).
- 831 97. Therneau, T. *A package for survival analysis in R*. (2020).
- 832 98. Zhao, X., Valen, E., Parker, B. J. & Sandelin, A. Systematic clustering of transcription start  
833 site landscapes. *PLOS ONE* **6**, e23409 (2011).
- 834 99. Bunis, D. G., Andrews, J., Fragiadakis, G. K., Burt, T. D. & Sirota, M. dittoSeq: universal  
835 user-friendly single-cell and bulk RNA sequencing visualization toolkit. *Bioinformatics* (2020)  
836 doi:10.1093/bioinformatics/btaa1011.
- 837 100. *morpheus: Interactive heat maps using 'morpheus.js' and 'htmlwidgets'*. (2021).
- 838 101. Pedersen, T. L. *Patchwork: The Composer of Plots*. R. (2020).
- 839 102. Kassambara, A. *ggpubr: 'ggplot2' Based Publication Ready Plots*. (Based Publication,  
840 2020).

841

842

843

844

845

846

847

848

849

850

851

852

853

854

855 **FIGURES**

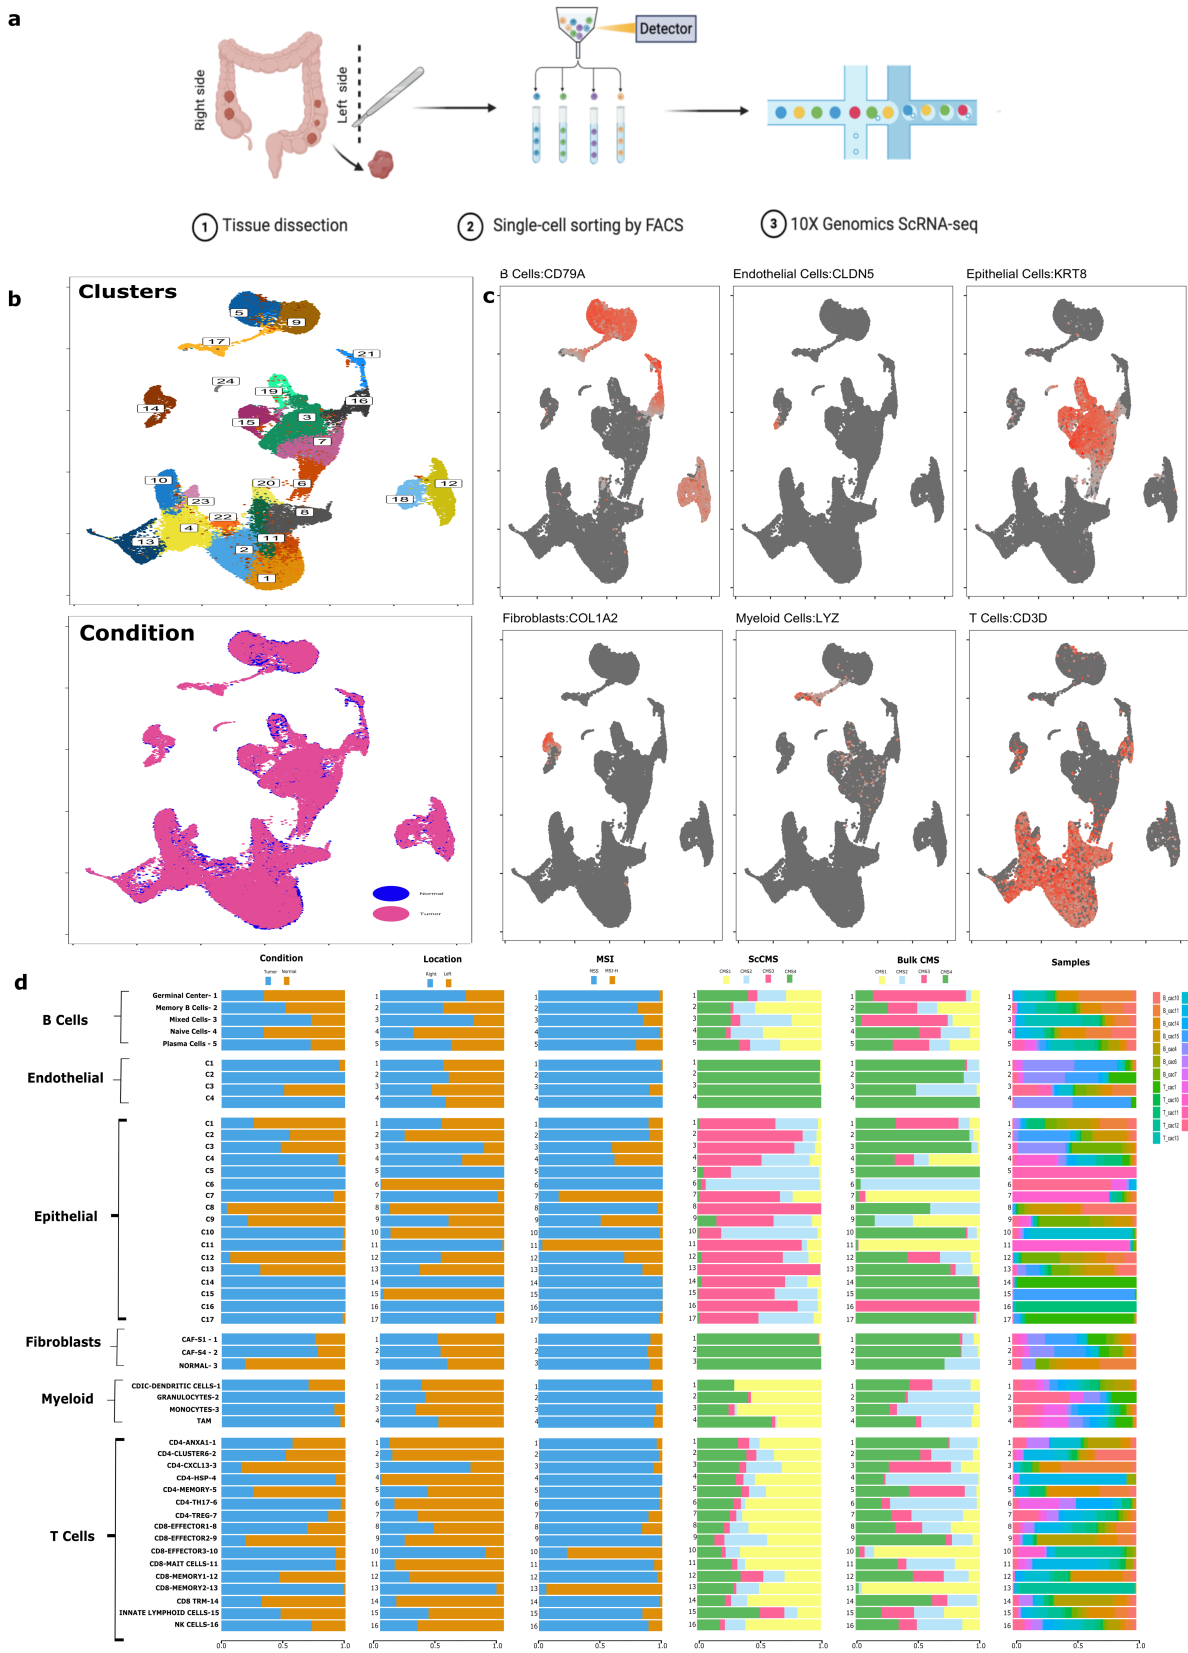

857 **Figure 1. Identification and clustering of single cells.** **a**, Workflow of sample collection,  
858 sorting, and sequencing (methods contain full description for each step). **b**, UMAP  
859 characterization of the 49,859 cells profiled. Coloring demonstrates clusters, tumor vs. non-  
860 malignant sample origin (condition), and individual sample origin. **c**, Identification of various cell  
861 types based on expression of specified marker genes. **d**, Characterization of the proportion of  
862 cell types identified in tumor vs. non-malignant tissue, sidedness (right vs. left), microsatellite  
863 instability (MSI) status, single-cell Consensus Molecular Subtypes (scCMS) classification,  
864 Consensus Molecular Subtypes (CMS) of bulk RNA-seq data, and origin of sample. The  
865 transcription counts of tumor and normal tissue cell types are demonstrated at the bottom with  
866 boxplot representation. The graph represents total clusters and cell types identified after re-  
867 clustering of each cell compartment depicting global heterogeneous landscape of colorectal  
868 cancers.

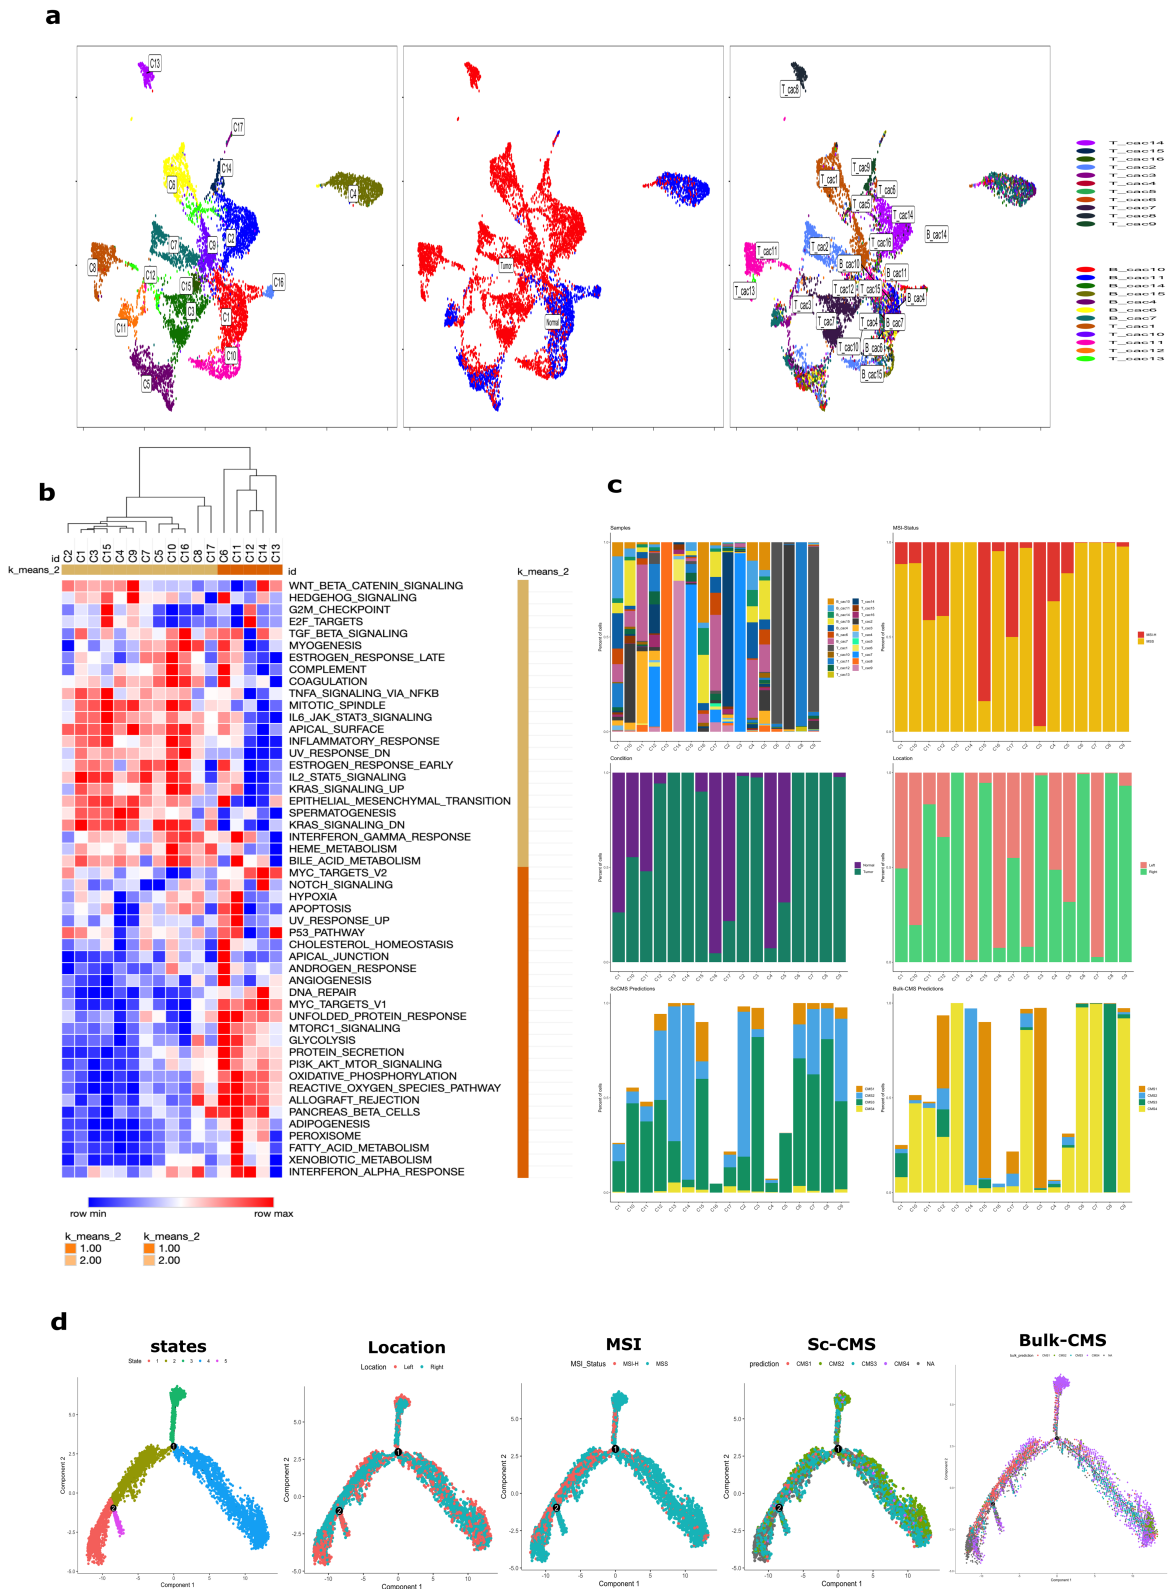

**Figure 2. Reclustering and characterization of the epithelial compartment.** **a**, UMAP of tumor and non-malignant epithelial reclustering demonstrating 17 distinct clusters. **b**, Heatmap of Hallmark pathway analysis within the epithelial cell compartment. **c**, Bar chart representation of cell proportions by sample, tissue type, MSI status, colonic location of sample, scCMS score, and bulk CMS score. **d**, Trajectory analysis of cells colored by colonic location, scCMS, MSI status, and bulk CMS status.



**a**

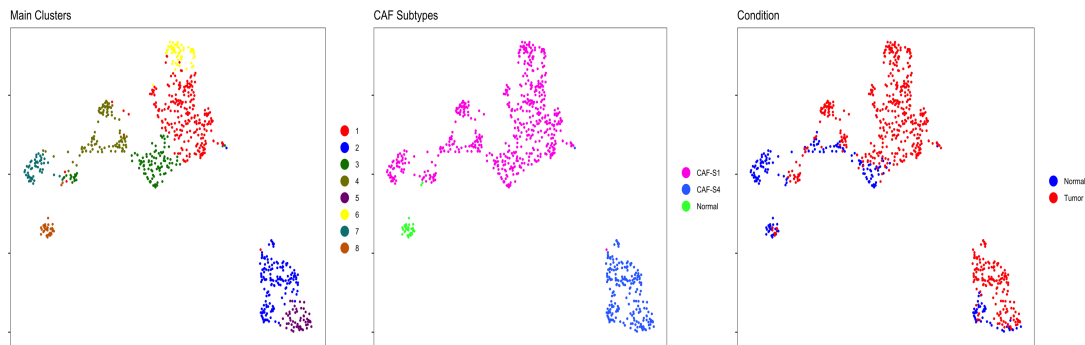

**b**

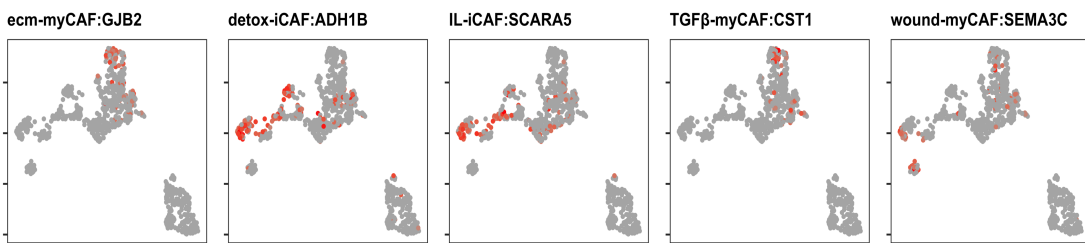

**c**

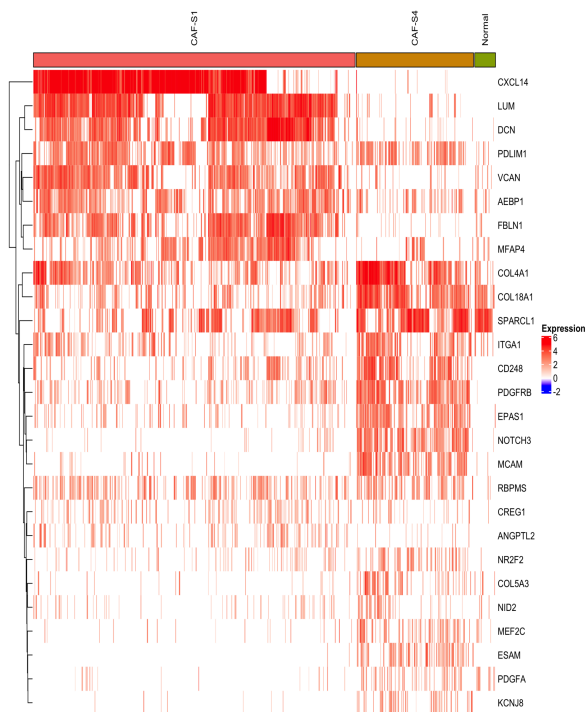

**d**

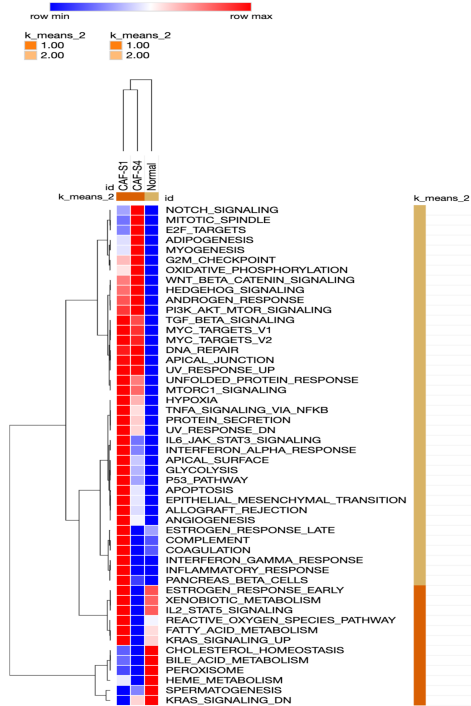



**Figure 3. Fibroblast clusters in colon and colorectal tumors. a**, UMAP of 819 fibroblasts colored by distinct clusters, CAF status, tissue status and origin of sample. UMAP fibroblasts colored by specific CAF-S1 subtypes. **b**, UMAP color-coded for marker genes for five CAF-S1 subtypes as indicated. **c**, Heatmap showing the variable expression of fibroblast specific marker genes across CAF-S1, CAF-S4, and normal fibroblasts. **d**, Heatmap of Hallmark pathway analysis of CAF-S1, CAF-S4, and normal cluster.

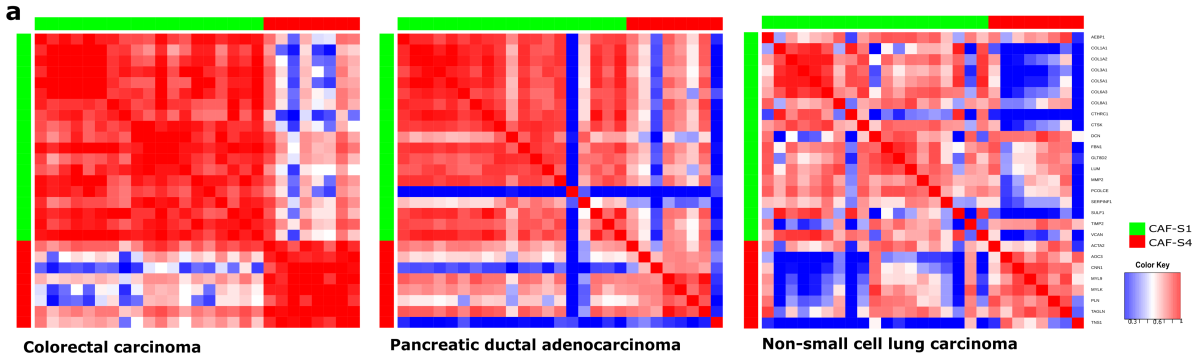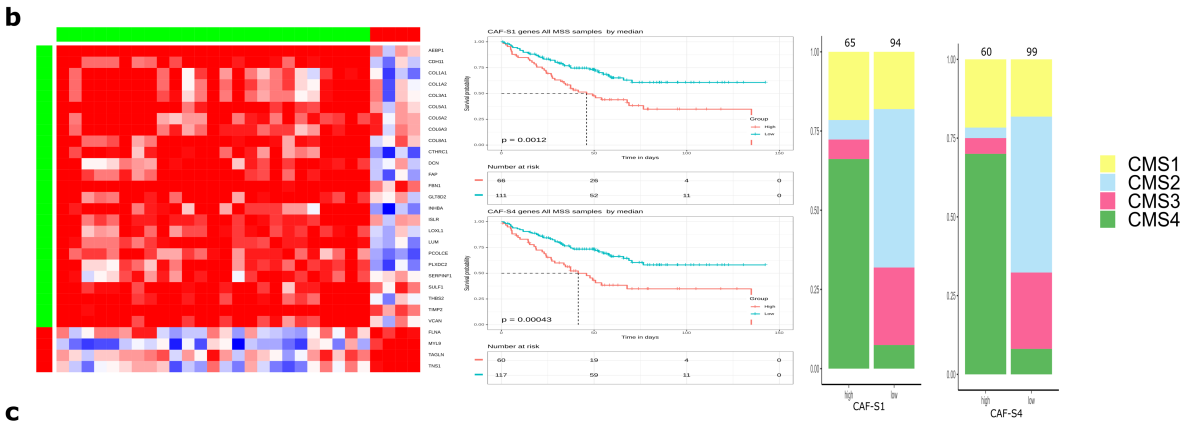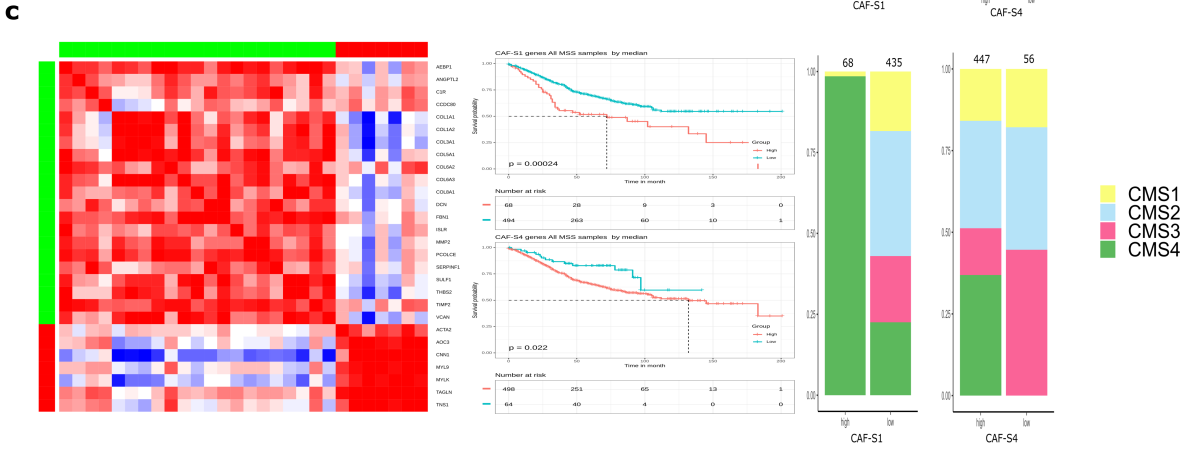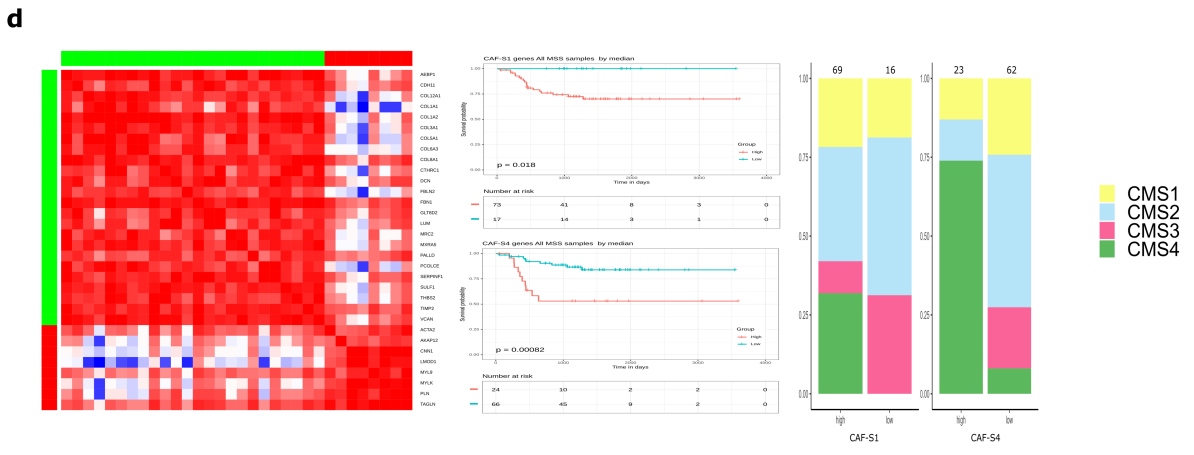

**Figure 4. Correlation of CAF-S1 and CAF-S4 gene profiles across human bulk transcriptomic data.** **a**, Pearson's correlation of genes from CAF-S1 and CAF-S4 profiles in colorectal cancer (n= 1584; CAF-S1 and CAF-S4  $r > 0.8$ ), pancreatic cancer (n= 11; CAF-S1  $r = 0.70$ , CAF-S4  $r = 0.60$ ), non-small cell lung cancer (n = 80; CAF-S1  $r = 0.69$ , CAF-S4  $r = 0.67$ ). **b-d**, Pearson correlation plots, Kaplan-Meyer survival curves, and bar plots of CMS status assessing CAF expression in individual CRC datasets. Plots b-c are generated from single GEO datasets; GSE17536 (n = 177), GSE39582 (n= 585) and GSE33113 (n= 96), respectively. Note: High CAF-S1 and CAF-S4 gene signatures are associated with poor survival across all CMS subtypes.  $r =$  coefficient correlation.

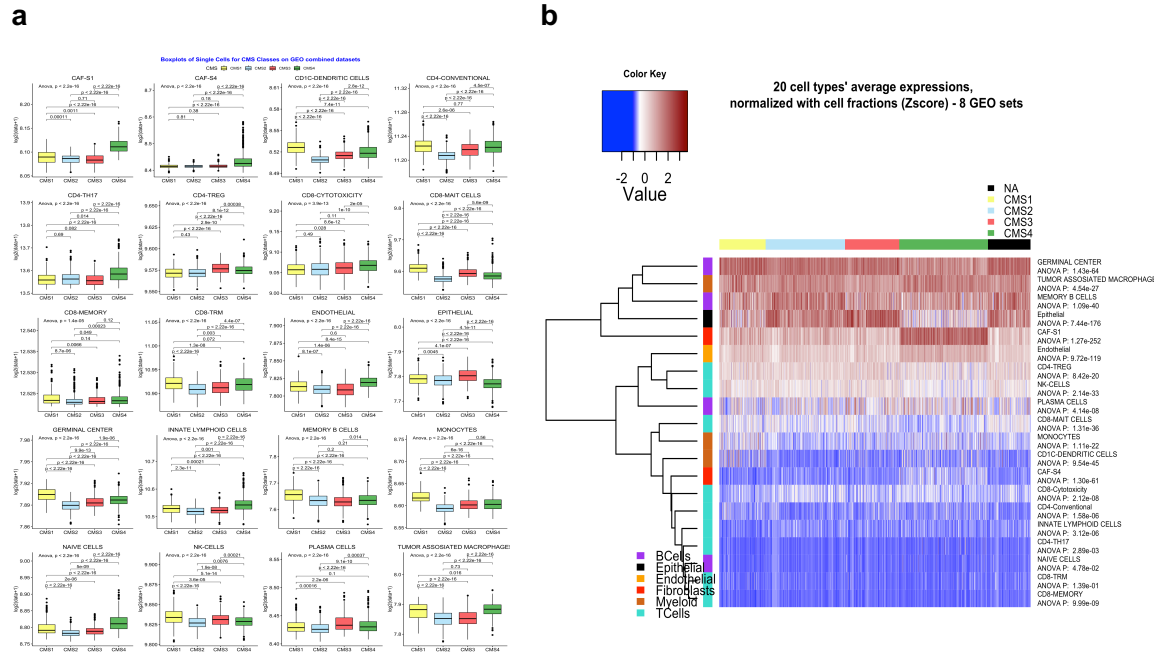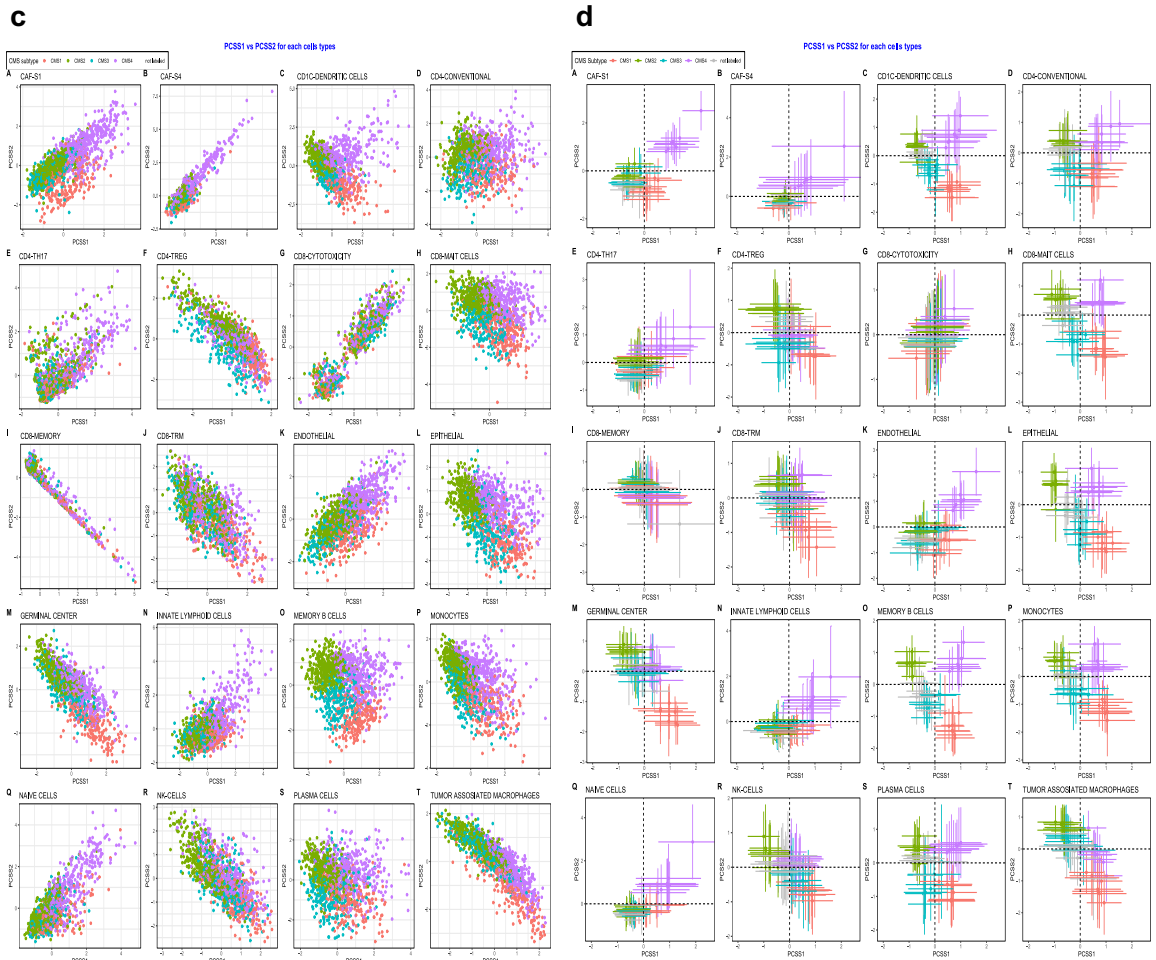

**Figure 5. Average cell type abundance from eight pooled CRC datasets and sorted by bulk CMS status.** **a**, Boxplots show the distribution of cell types within tumors with varying CMS status. The whiskers depict the 1.5 x IQR. The p-values for one-way ANOVA are shown in the figure. **b**, Deconvolution heatmap of different cell types by average expression using CIBERSORTx demonstrating cell type distribution (based on individual datasets) within each CMS category. **c**, All 20 cell types show no to little separation reported by CMS. **d**, All cell types projected on four quadrants representing CMS1-4 using PCSS1 and PCSS2 scores. Markers are colored by the bulk CMS status. Note that the cell types largely form a continuum along CMS status and are not clustered in discrete quadrants separate from one another. Cells are colored by bulk CMS status accordingly to origin of sample.

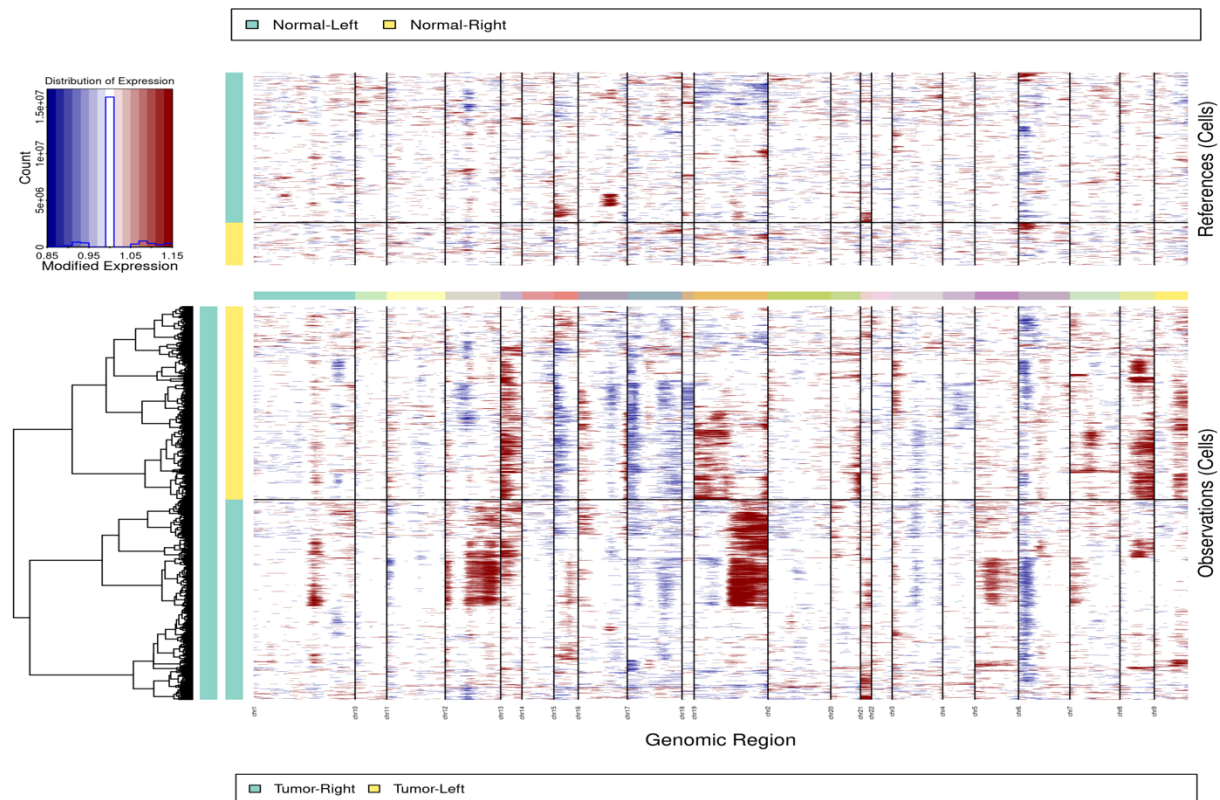

**Supplementary Figure 1: Analysis of copy number variation (CNV) amongst epithelial cells.** CNV analysis was conducted on the epithelial cell compartment. CNV alterations are seen in tumor-derived epithelial cells (observation). Non-malignant-derived epithelial cells were used as control (references).

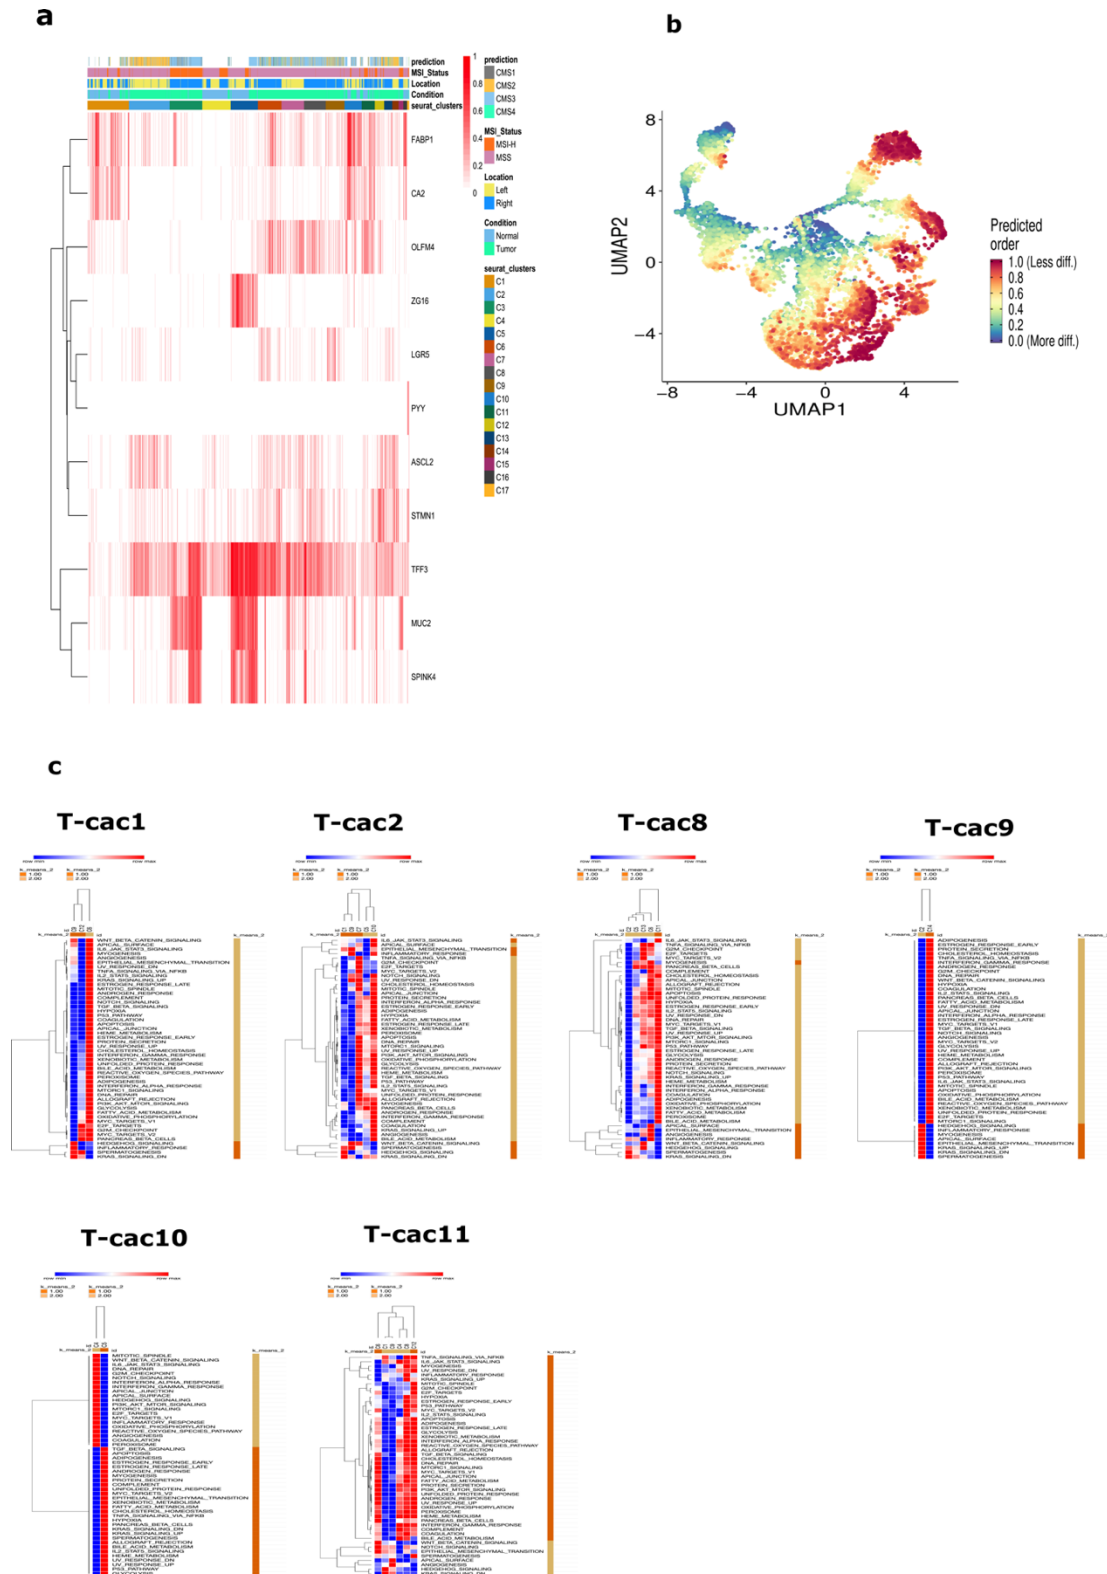

**Supplementary Figure 2: Epithelial cell compartment demonstrating subclonal heterogeneity. a**, Heatmap of marker gene expression for the epithelial and tumor cells. **b**,



UMAP visualization of computational analysis of differentiation status using CytoTRACE (see methods). **c**, Heatmap representation of Hallmark pathway analysis of epithelial phenotypes within six different tumor samples demonstrating subclonal, intratumoral heterogeneity.

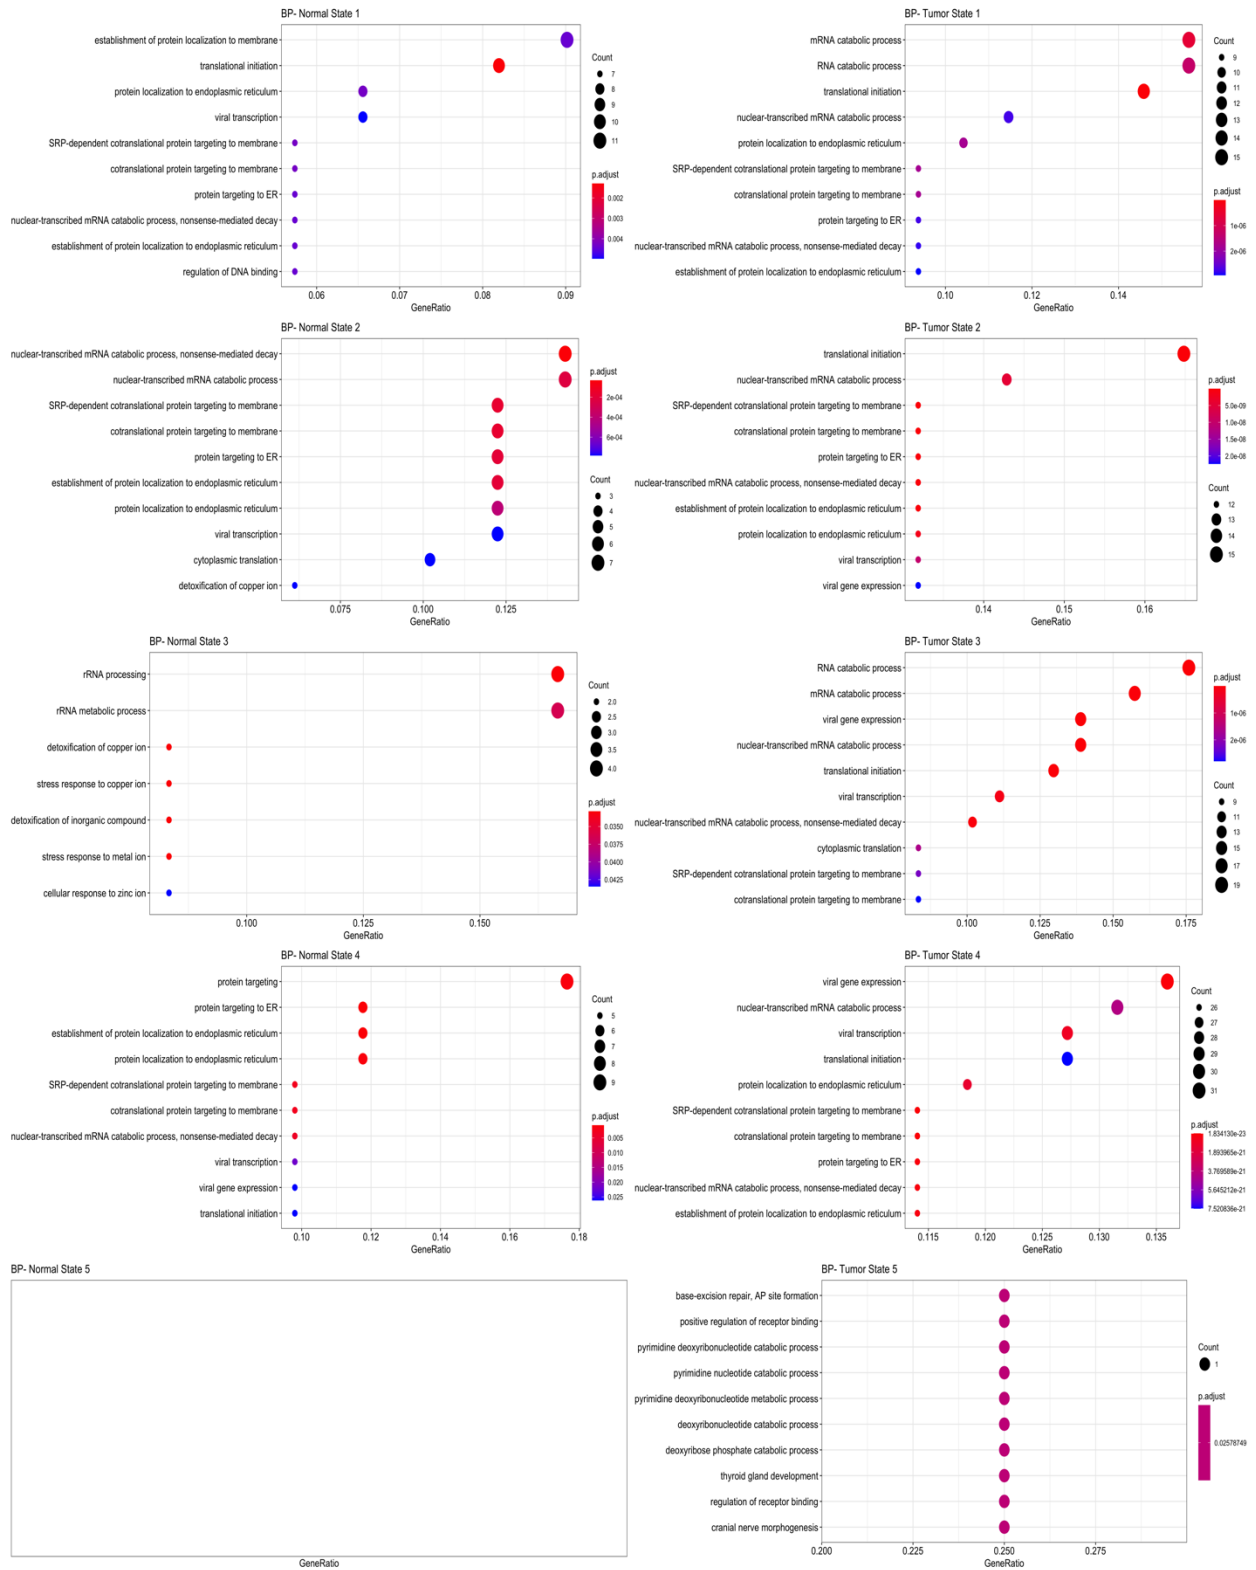

**Supplementary Figure 3: Pathway analysis (GO ontology) of gene-expressions specific to each cell-state in trajectory analysis stratified by malignant and non-malignant sample of origin.**

**a**

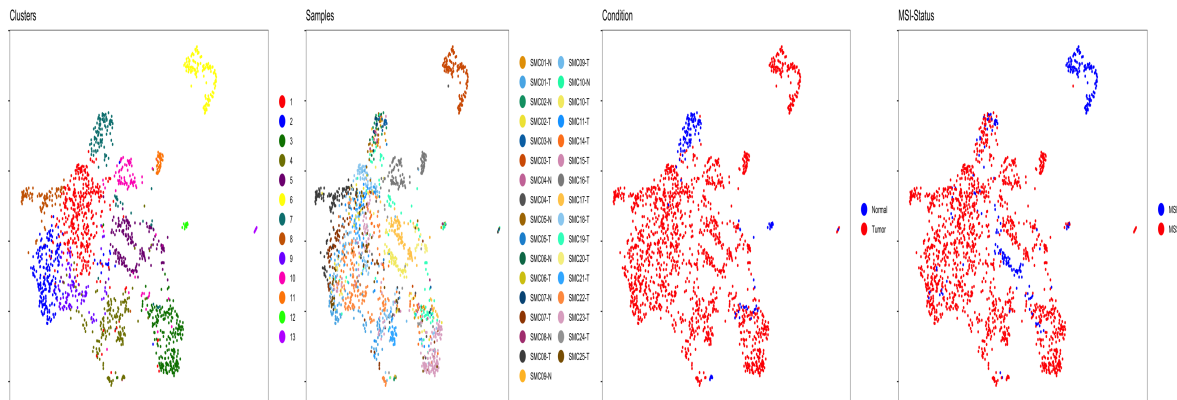

**b**

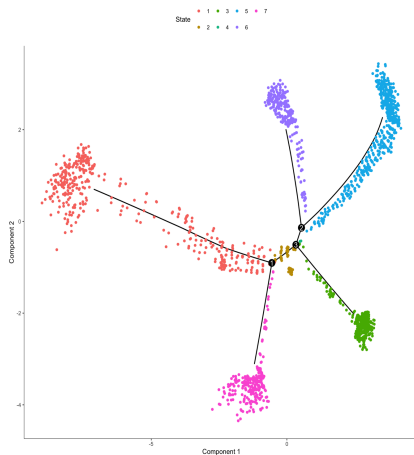

**States**

**c**

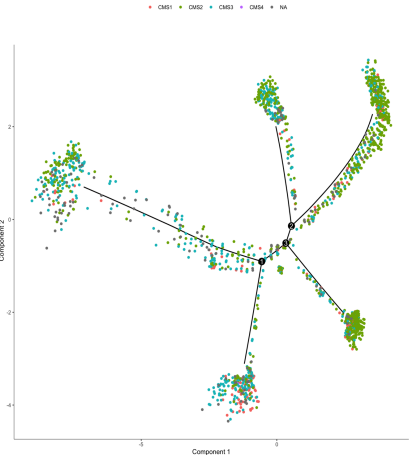

**Sc-CMS**

**d**

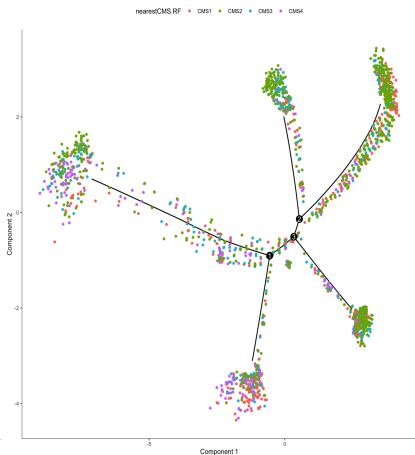

**Bulk CMS**

**Supplementary Figure 4: Epithelial clustering and differentiation trajectories from a validating cohort (Lee et al. data).** **a**, UMAP clustering of epithelial cells colored by cluster, sample of origin tumor vs. normal tissue status, and microsatellite instability Status (MSI) status. **b**, Differentiation trajectories of epithelial cells colored by differentiation state. **c**, Differentiation trajectory of epithelial cell colored by state and Consensus Molecular Subtypes (CMS) status in *single-cell* and in **d**, Differentiation trajectory of epithelial cell colored by state and Consensus Molecular Subtypes (CMS) status in *bulk RNA-seq* using Monocle2 confirming stochastic behavior of tumor epithelial cells (see methods).

**a**

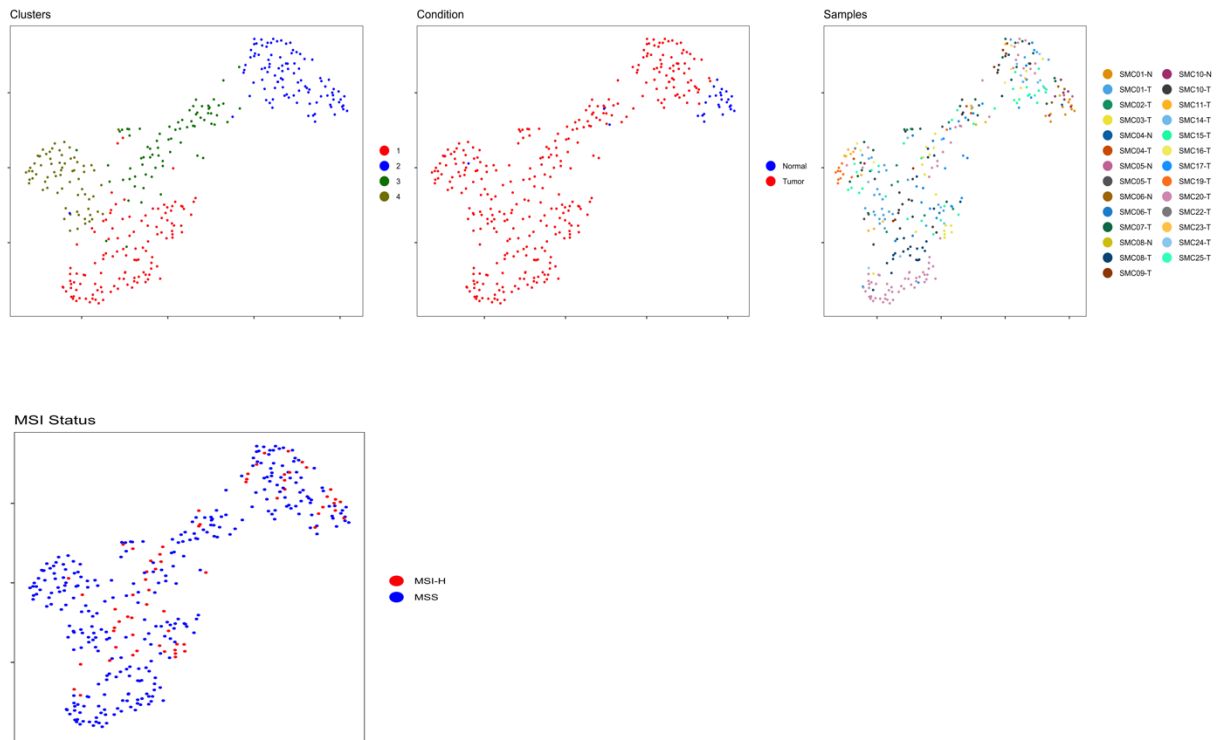

**b**

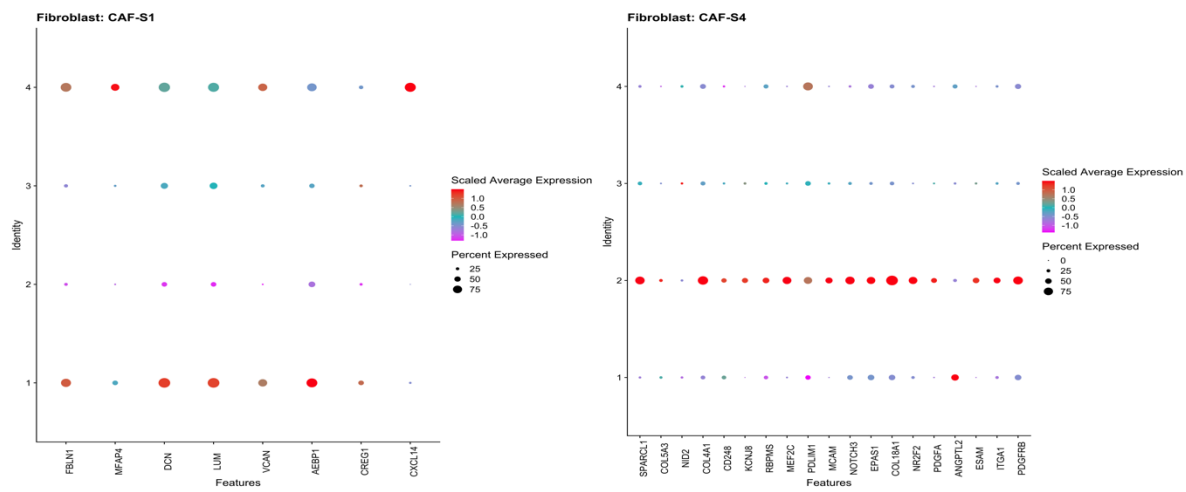

**Supplementary Figure 5: Characterization of fibroblasts and their transcriptomic expression patterns (Lee et al. data).** **a**, Fibroblasts colored by distinct groups, tumor vs. normal sample, and sample specimen. **b**, Dot plot demonstrating variable expression patterns of subtypes of CAF-S1 and CAF-S4 confirming their relevance in colorectal cancer.

**a**

**GSE17536**

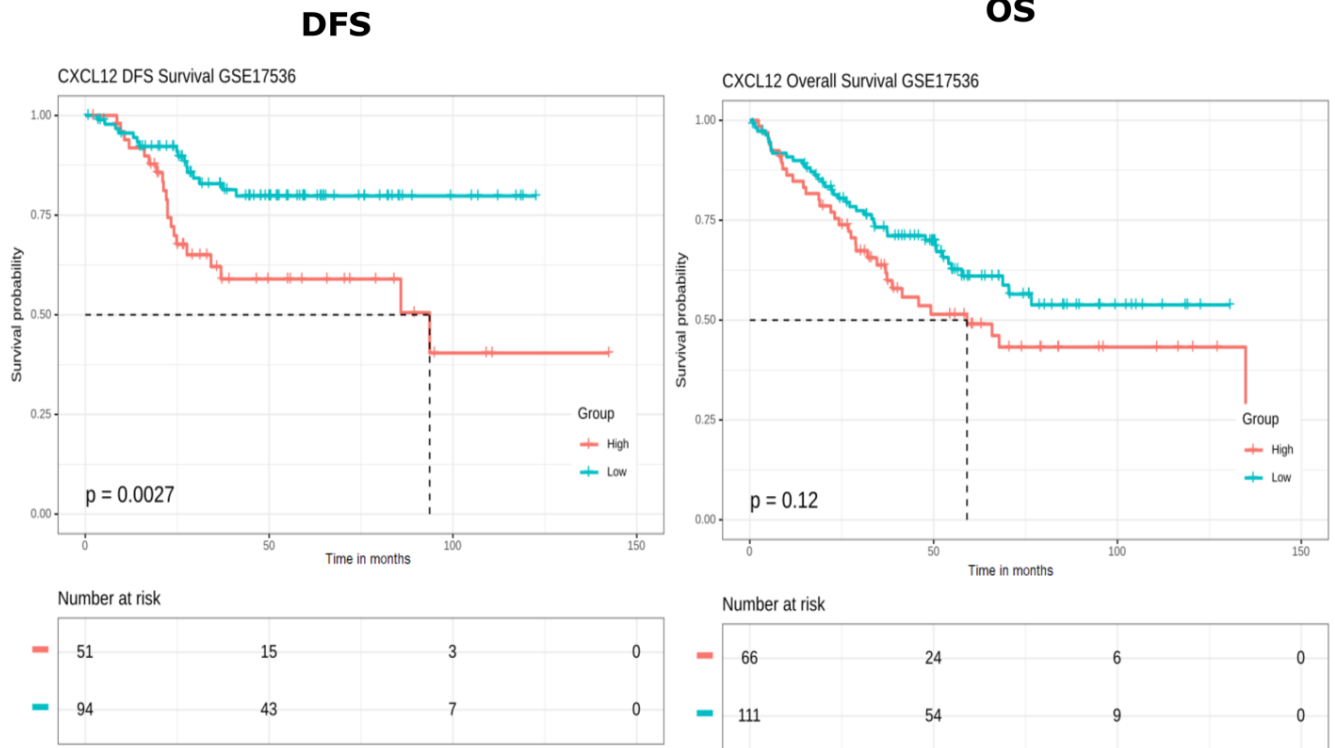

**b**

**GSE39582**

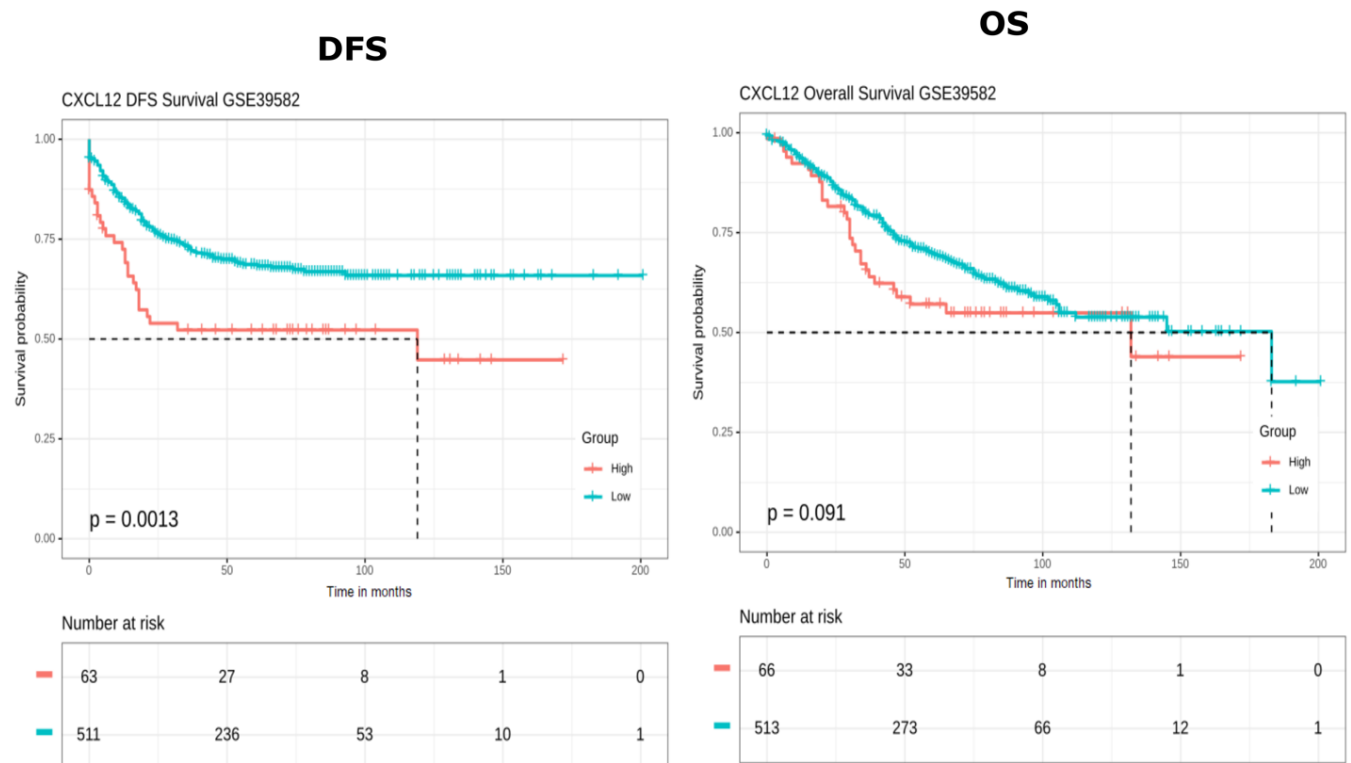



**Supplementary Figure 6: a**, Kaplan-Meier analysis of patients with high and low expression levels of CXCL12 (derived from CAF-S1) in the bulk transcriptomic data from GSE17536 (n=177). **b**, Kaplan-Meier analysis of DFS and OS between patients with high and low expression levels of CXCL12 in the bulk transcriptomic data from GSE39582 (n=585).

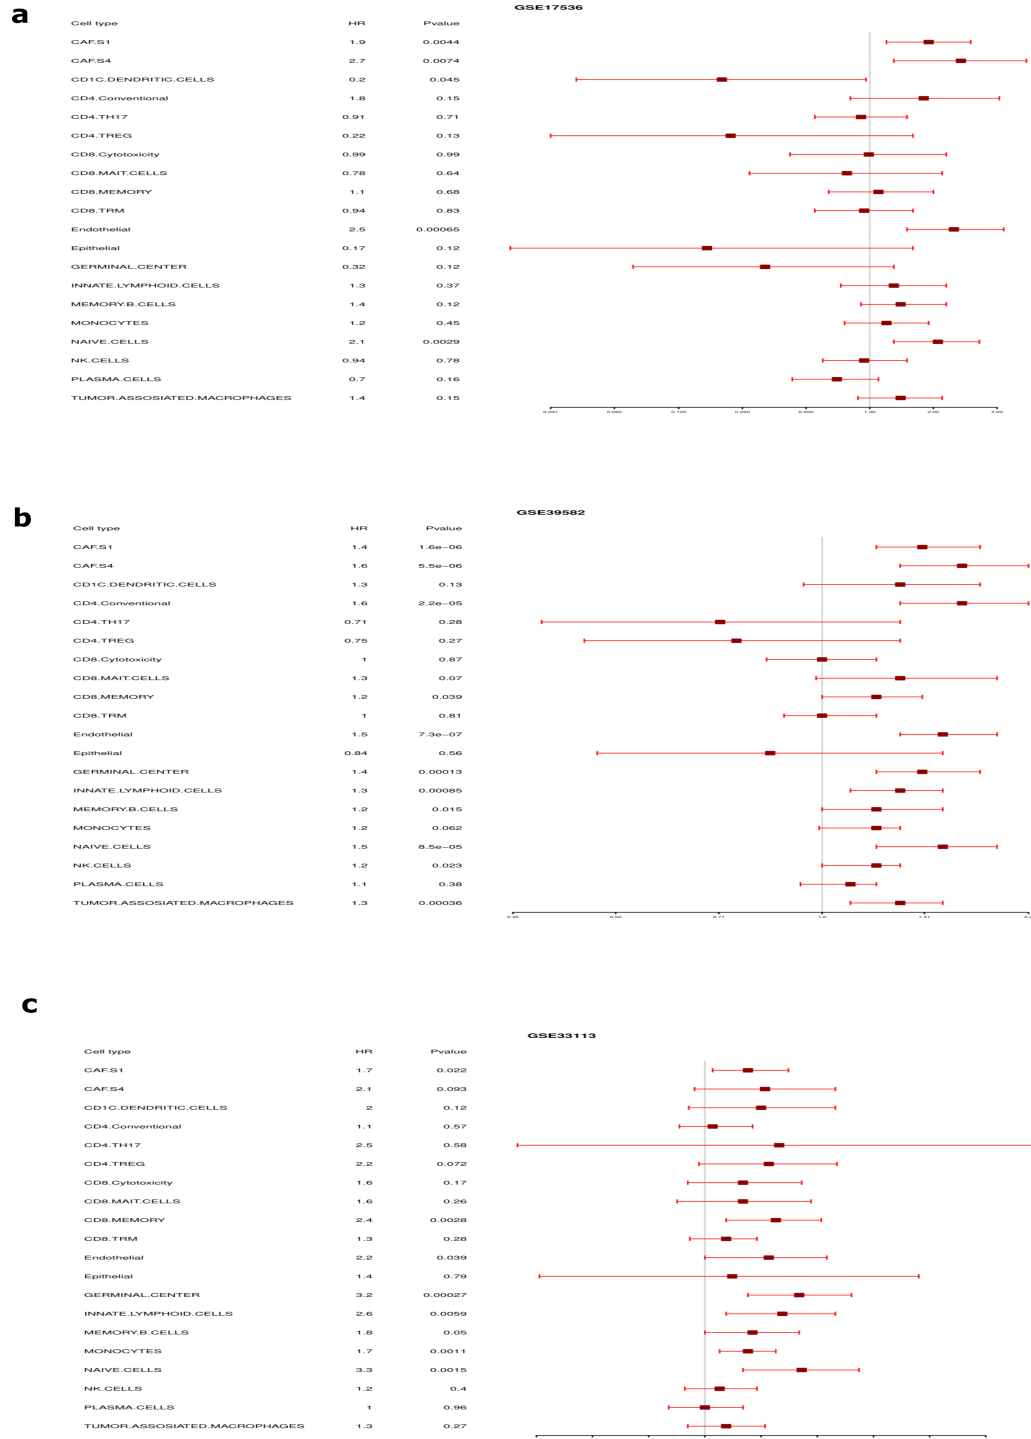

**Supplementary Figure 7: Association between relative cell abundance and patient survival from microarray-based datasets. a, GSE17536 (n=177). b, GSE39582 (n=585). c, GSE33113 (n=96). Note that CAF-S4 is not significant in GSE33113 ( $p=0.093$ ).**

**a**

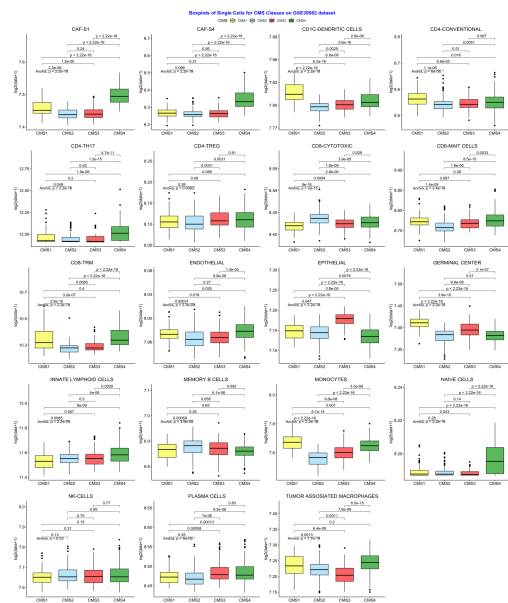

**b**

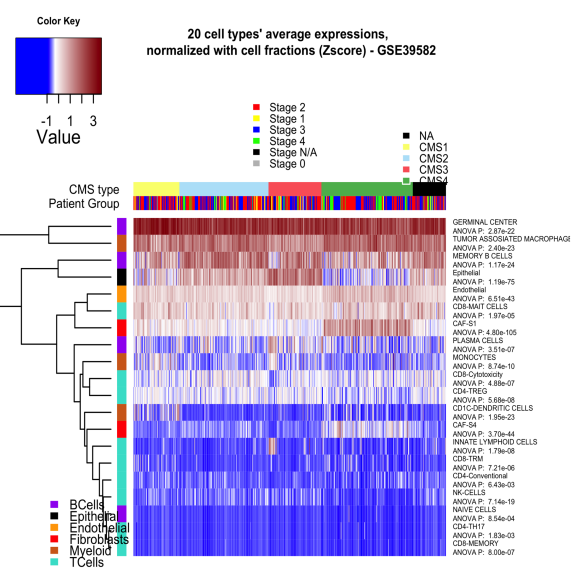

**c**

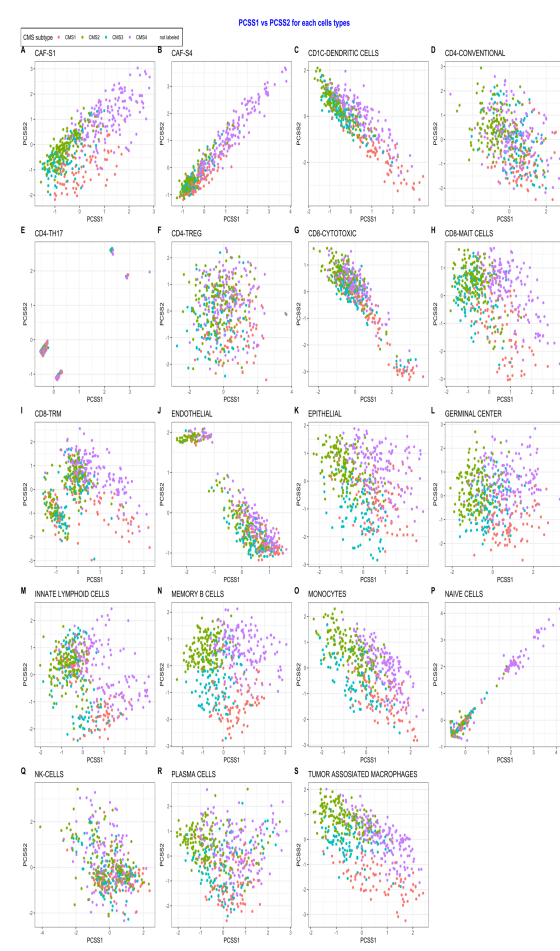

**d**

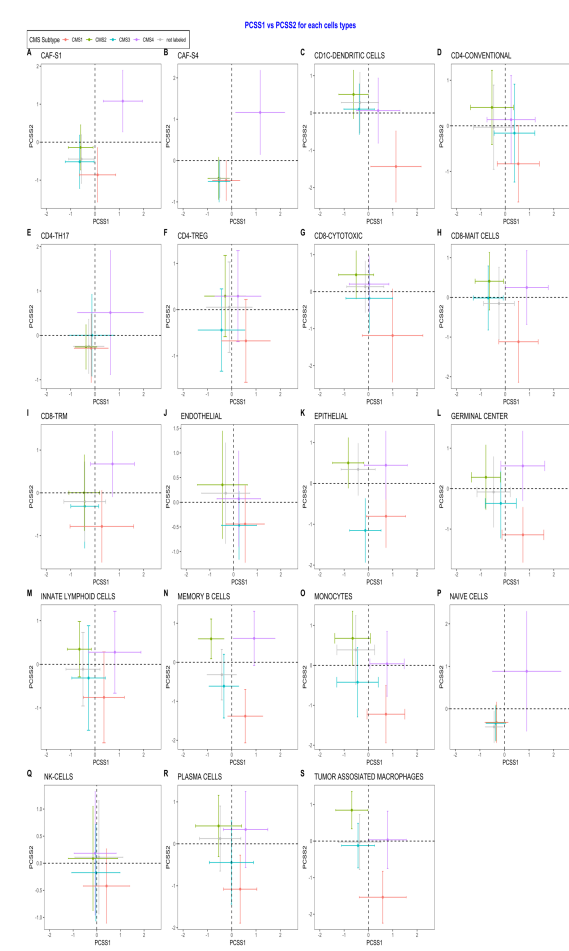

**Supplementary Figure 8: Cell abundance prediction for each sample and projected on bulk CMS on GSE39582 (n= 585).** **a**, Boxplots show the distribution of cell types within tumors with varying Consensus Molecular Subtypes(CMS) status. The whiskers depict the 1.5 x IQR. The p-values for one-way ANOVA are shown in the figure. **b**, Deconvolution heatmap of cell type by average expression using CIBERSORTx demonstrating cell type distribution within each CMS status of a single dataset. **c**, 19 cell types show no to little separation reported by CMS. **d**, All cell types projected on four quadrants representing CMS1-4 using PCSS1 and PCSS2 scores. Markers are colored by the bulk CMS status. Note that, largely, the cell types form a continuum along CMS status and are not clustered in discrete quadrants from one another. Cells are colored by bulk CMS status of sample of origin.

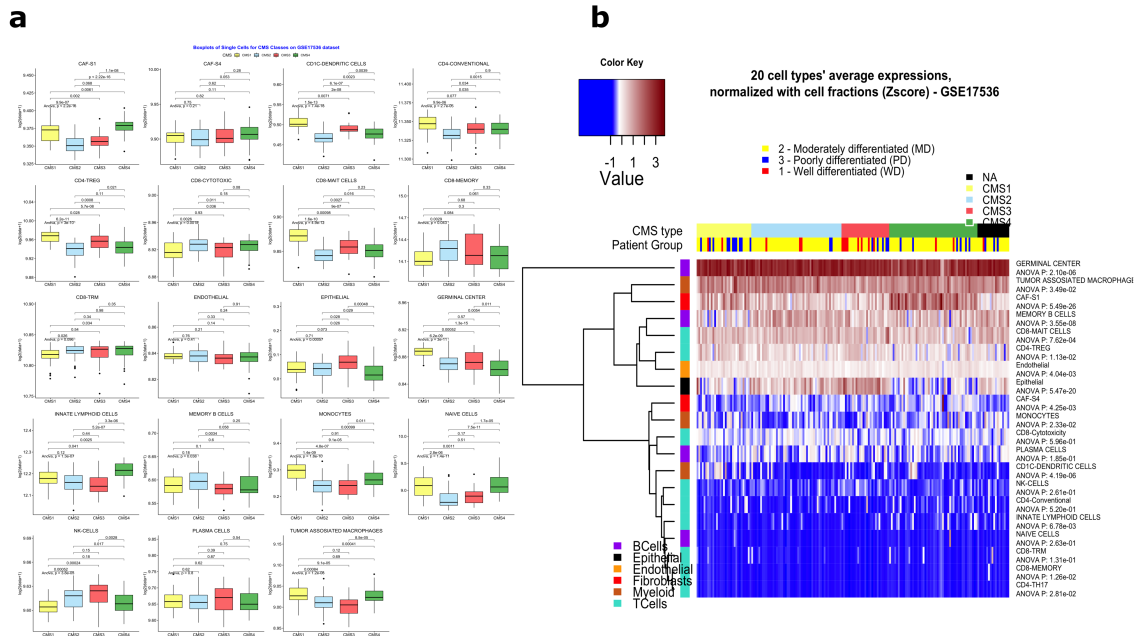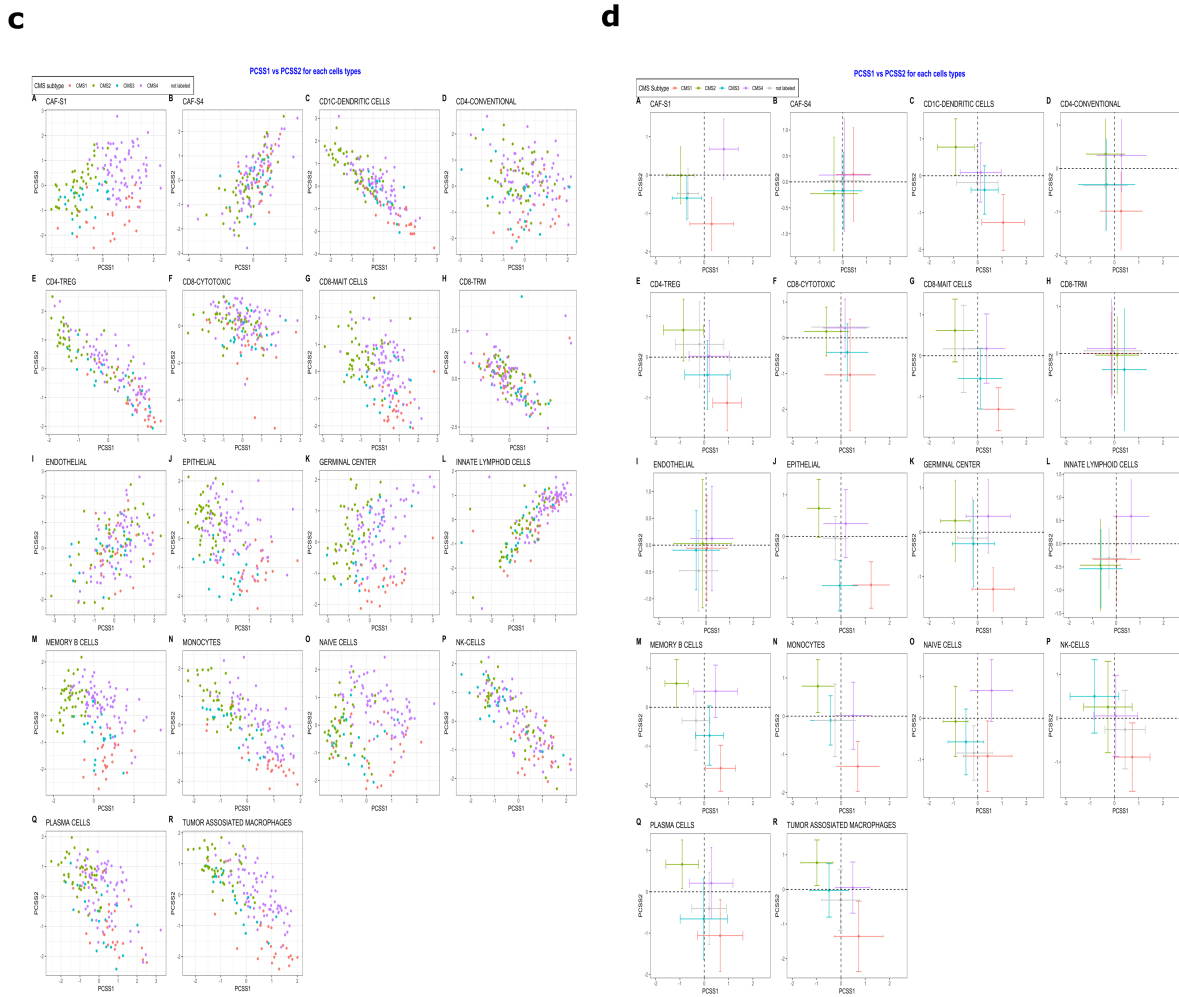

**Supplementary Figure 9: Cell abundance prediction for each sample and projected on bulk CMS on GSE17536 (n= 177).** **a**, Boxplots show the distribution of cell types within tumors with varying Consensus Molecular Subtyping (CMS) status. The whiskers depict the 1.5 x IQR. The p-values for one-way ANOVA are shown in the figure. **b**, Deconvolution heatmap of cell type by average expression using CIBERSORTx demonstrating cell type distribution within each CMS status of a single dataset. **c**, 18 cell types show no to little separation reported by CMS. **d**, All cell types projected on four quadrants representing CMS1-4 using PCSS1 and PCSS2 scores. Markers are colored by the bulk CMS status. Note that, largely, the cell types form a continuum along CMS status and are not clustered in discrete quadrants from one another. Cells are colored by bulk CMS status of sample of origin.

**a**

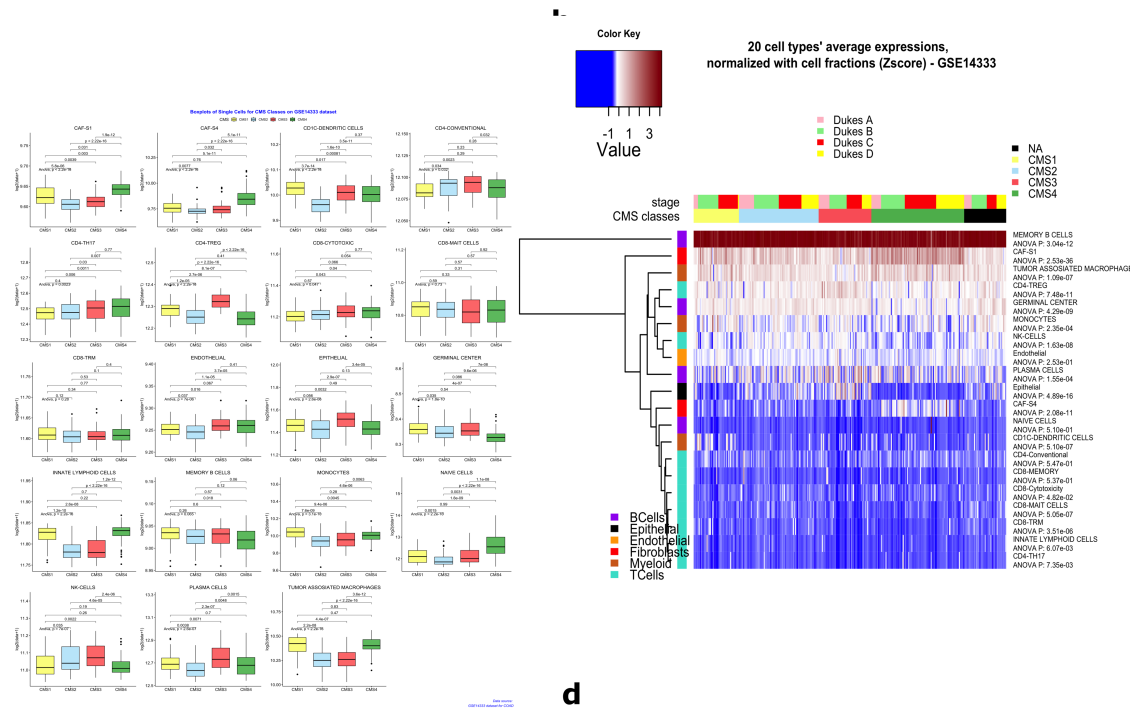

**c**

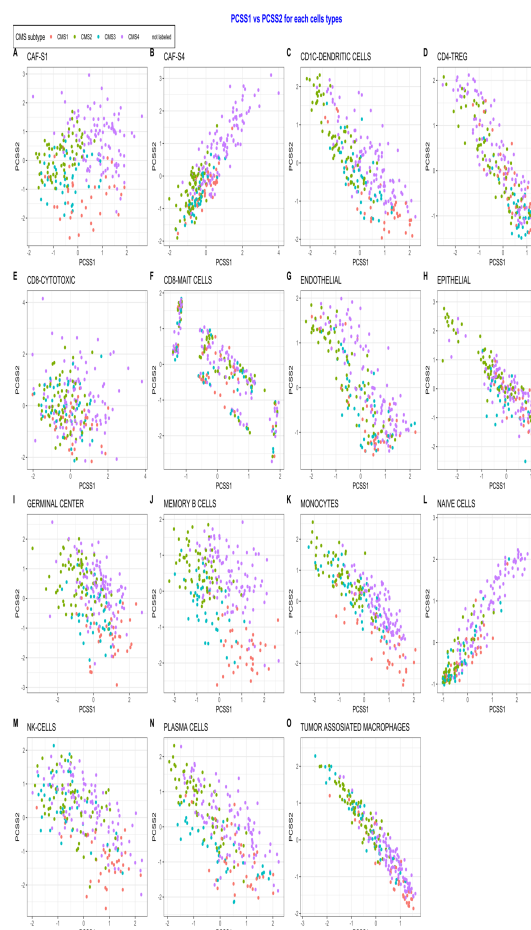

**d**

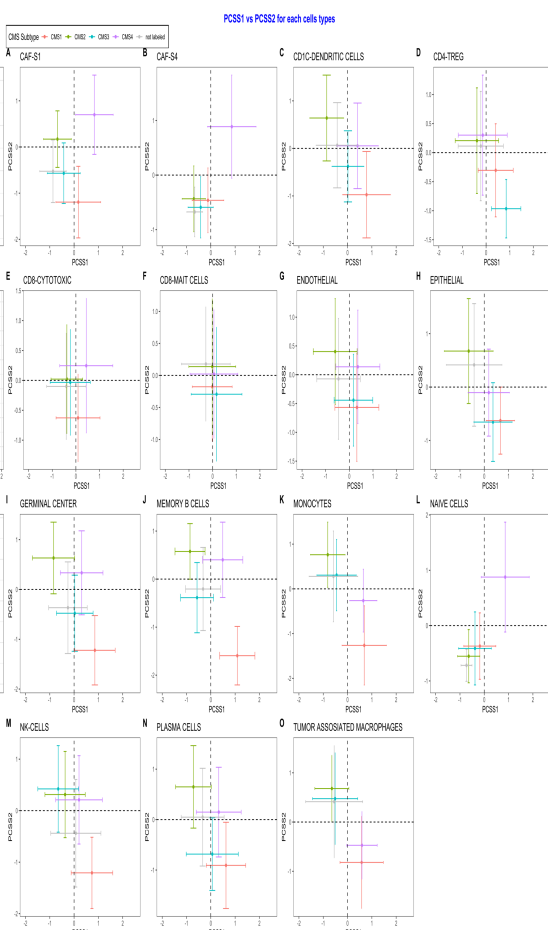



**Supplementary Figure 10: Cell abundance prediction for each sample and projected on bulk CMS on GSE14333 (n=290).** **a**, Boxplots show the distribution of cell types within tumors with varying Consensus Molecular Subtypes (CMS) status. The whiskers depict the 1.5 x IQR. The p-values for one-way ANOVA are shown in the figure. **b**, Deconvolution heatmap of cell type by average expression using CIBERSORTx demonstrating cell type distribution within each CMS status of a single dataset **c**, 19 cell types show no to little separation reported by CMS. **d**, All cell types projected on four quadrants representing CMS1-4 using PCSS1 and PCSS2 scores. Markers are colored by the bulk CMS status. Note that, largely, the cell types form a continuum along CMS status and are not clustered in discrete quadrants from one another. Cells are colored by bulk CMS status of sample of origin.

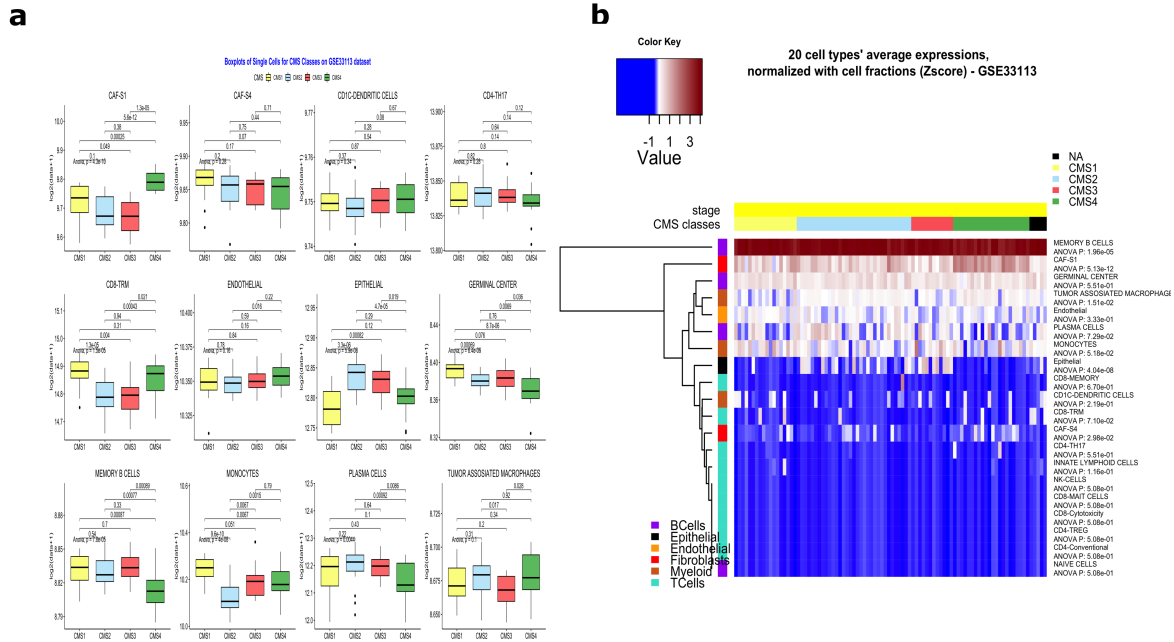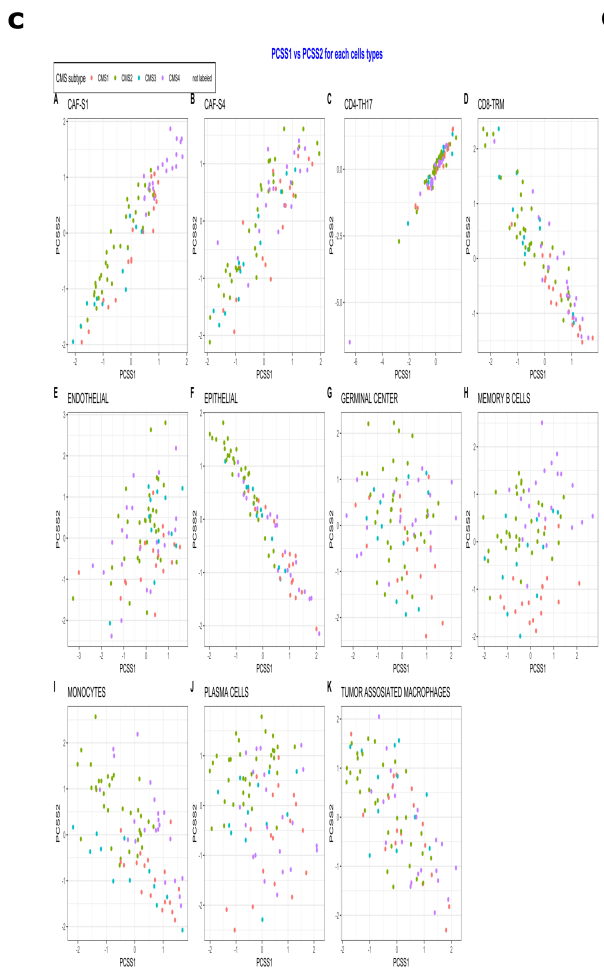

2 **Supplementary Figure 11: Cell abundance prediction for each sample and projected on**  
3 **bulk CMS on GSE33113 (n=96).** **a**, Boxplots show the distribution of cell types within tumors  
4 with varying Consensus Molecular Subtypes (CMS) status. The whiskers depict the 1.5 x IQR.  
5 The p-values for one-way ANOVA are shown in the figure. **b**, Deconvolution heatmap of cell  
6 type by average expression using CIBERSORTx demonstrating cell type distribution within each  
7 CMS status of a single dataset **c**, 19 cell types show no to little separation reported by CMS. **d**, All  
8 cell types projected on four quadrants representing CMS1-4 using PCSS1 and PCSS2 scores.  
9 Markers are colored by the bulk CMS status. Note that, largely, the cell types form a continuum  
10 along CMS status and are not clustered in discrete quadrants from one another. Cells are colored  
11 by bulk CMS status of sample of origin.  
12

**a**

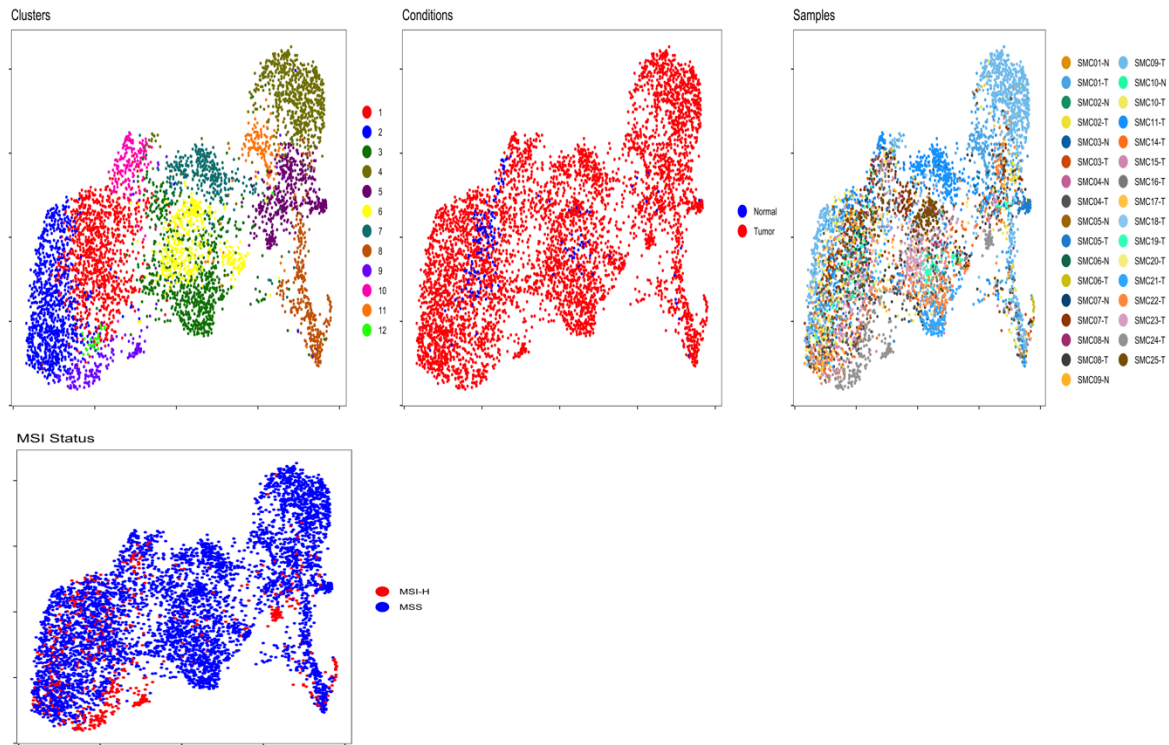

**b**

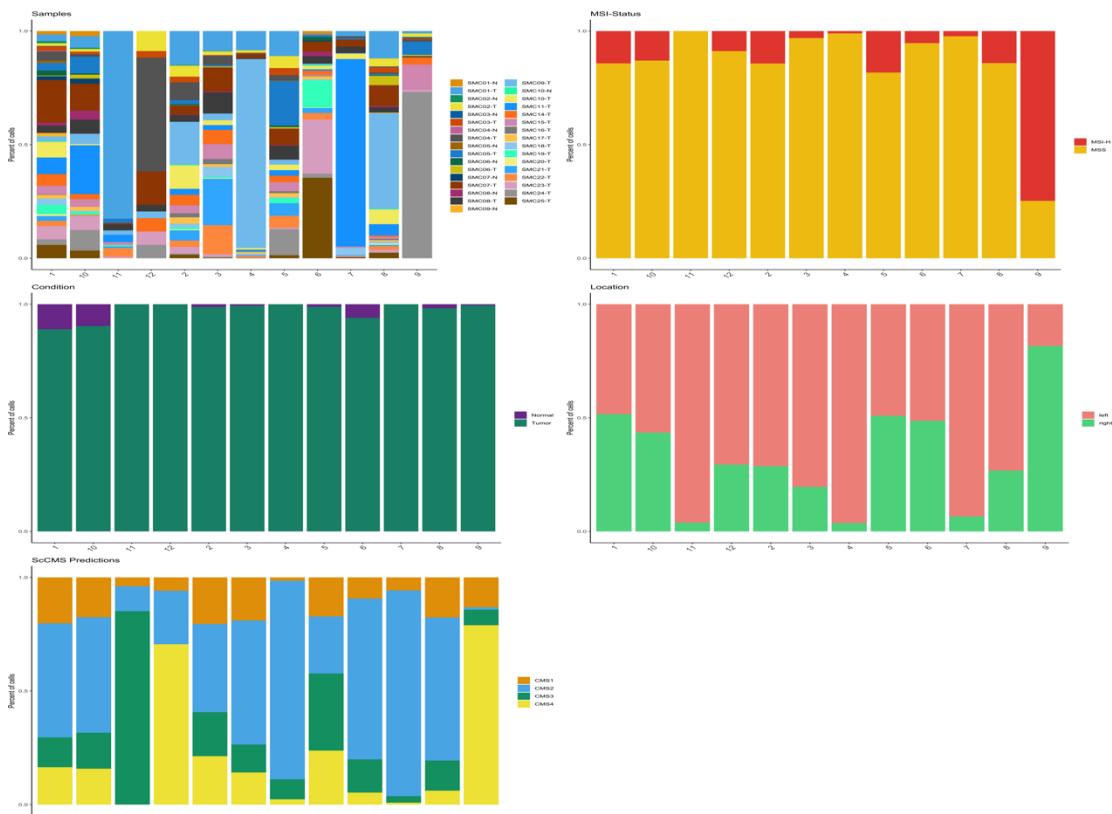

14 **Supplementary Figure 12: T/NK cell data from Lee et al. a**, Reclustering of T/NK cells and  
15 coloring by clusters, tumor vs. normal status, MSI status, and samples. **b**, Bar chart  
16 representation of cells colorized by our samples of origin, MSI status, tumor status, colonic  
17 location, Consensus Molecular Subtypes (CMS) status.

18

19

20

21

22

23

24

25

26

27

28

29

30

31

32

33

34

35

36

37

38

39

40

41

42

43

44

45

46

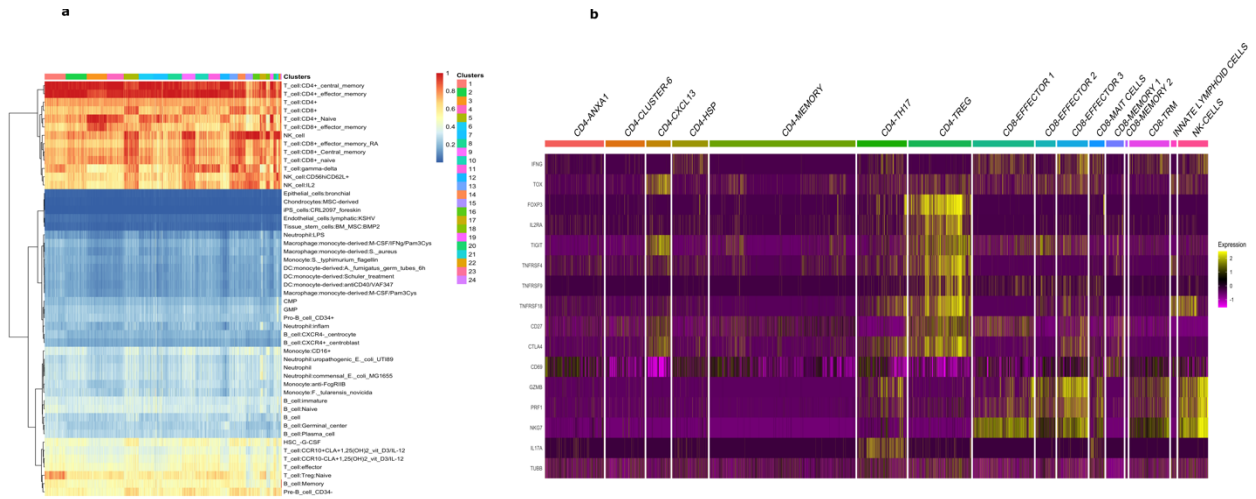

47

48

49 **Supplementary Figure 13: T cell expression analyses across T/NK cells. a**, SingleR  
50 heatmap cell type identification within each cluster. Note: doublets were removed from the  
51 further analysis. **b**, T/NK cell gene specific expression to identify T cell heterogeneity using  
52 published literature (see methods).

53

54

55

56

57

58

59

60

61

62

63

64

65

66

67

**a**

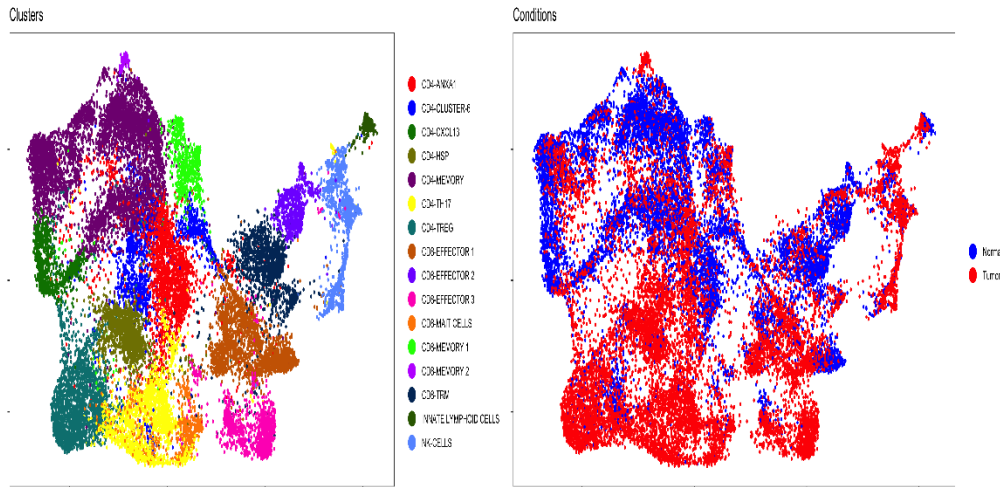

**b**

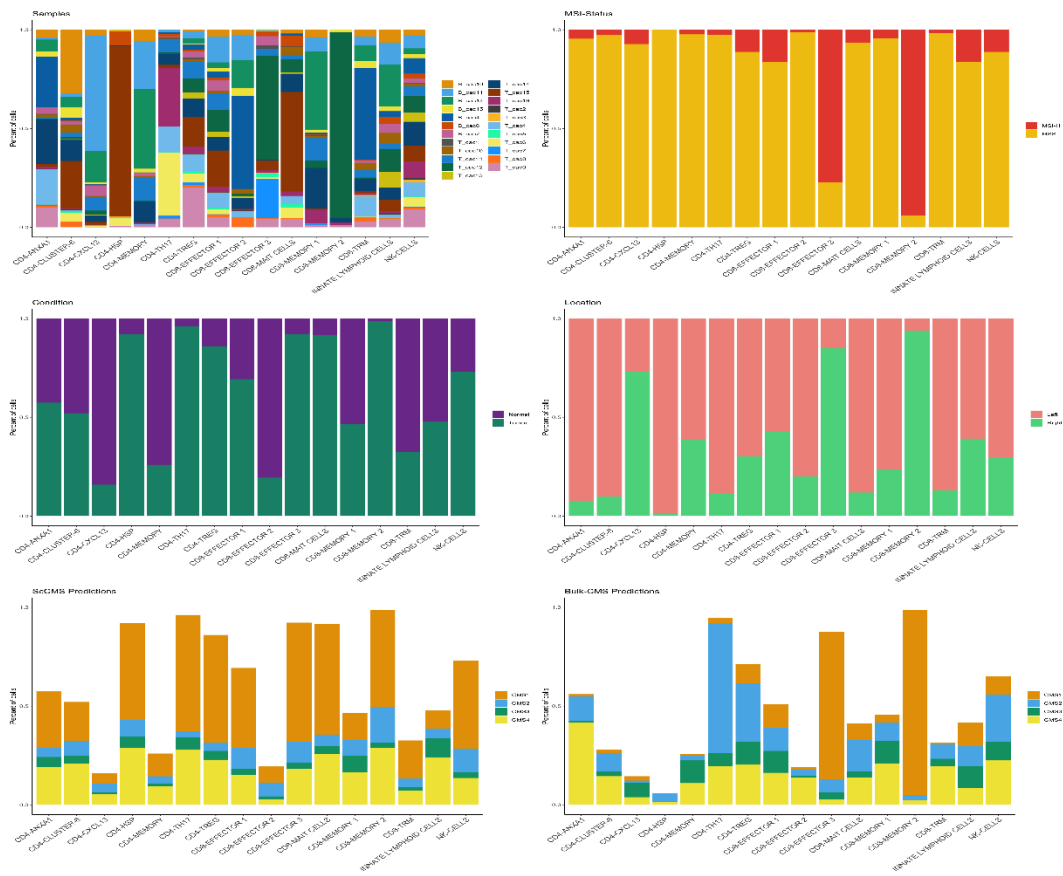





99 seen to enhance cancer vaccine efficacy in other tumors, suggesting a possible therapeutic  
 100 target in CRC.

101  
 102

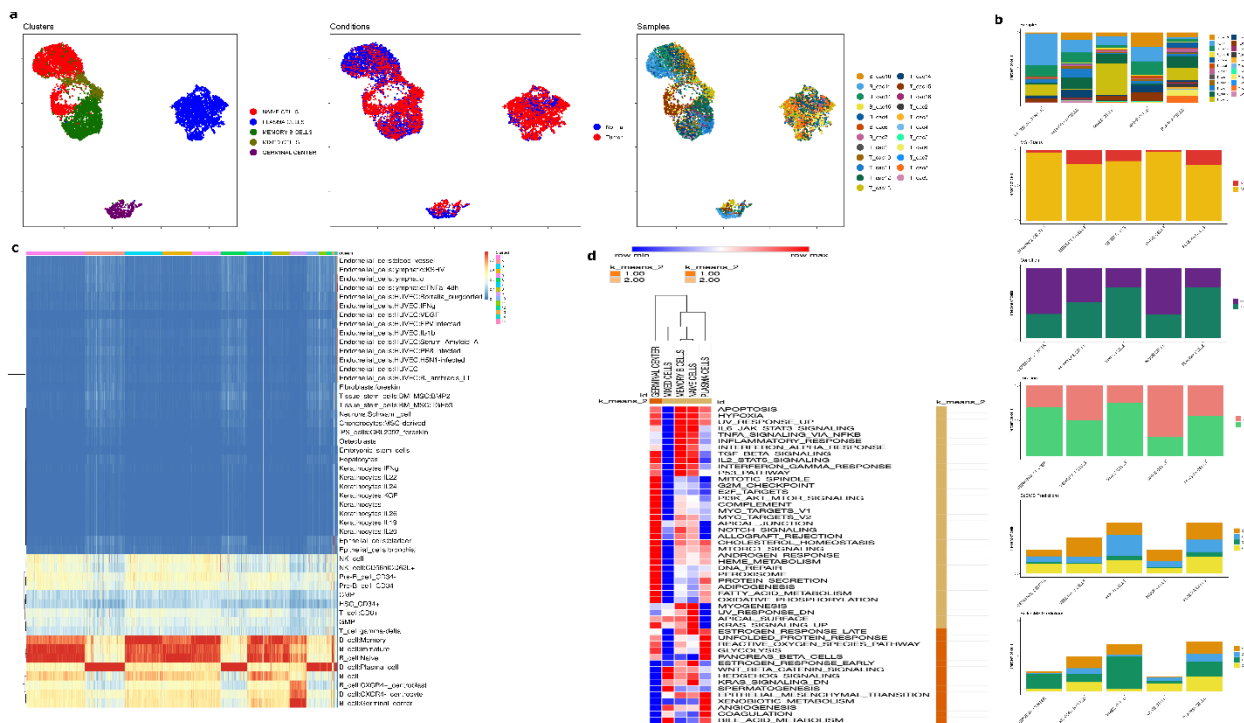

103  
 104 **Extended Data Figure 2. Reclustering of B cells with characterization of clusters and**  
 105 **phenotypes. a**, UMAP depiction of B cell reclustering colored by cluster, malignancy status,  
 106 and sample of origin. **b**, Bar plot depiction of the proportion of cells within each B cell phenotype  
 107 colored by sample of origin, MSI status, malignancy status, tumor location, scCMS and bulk  
 108 CMS. **c**, SingleR heatmap demonstration of B cell distribution within each cluster. **d**, B cell  
 109 Hallmark pathway analysis by phenotype. scCMS, single-cell consensus molecular subtyping;  
 110 bulk CMS, consensus molecular subtyping on Bulk RNA-seq data.

111 **Description:** To illustrate characteristics of B cells in CRC we reclustered 9,289 B cells that  
 112 clearly identified naive cells, memory cells, plasma cells, and germinal center (GC) B cells. All B  
 113 cell subtypes from the CRC TME and the non-malignant colonic tissue clustered together  
 114 exhibiting transcriptional similarity among non-tumor and tumor-derived cells. Memory B cells  
 115 and plasma cells were enriched in tumors, while naive and GC B cells were enriched in non-  
 116 malignant tissue.

117  
 118  
 119  
 120  
 121  
 122  
 123  
 124  
 125

**a**

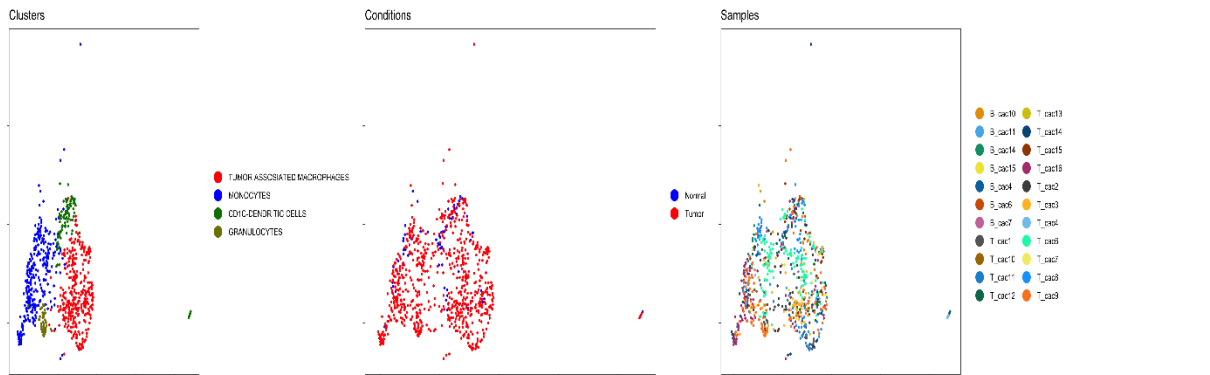

**b**

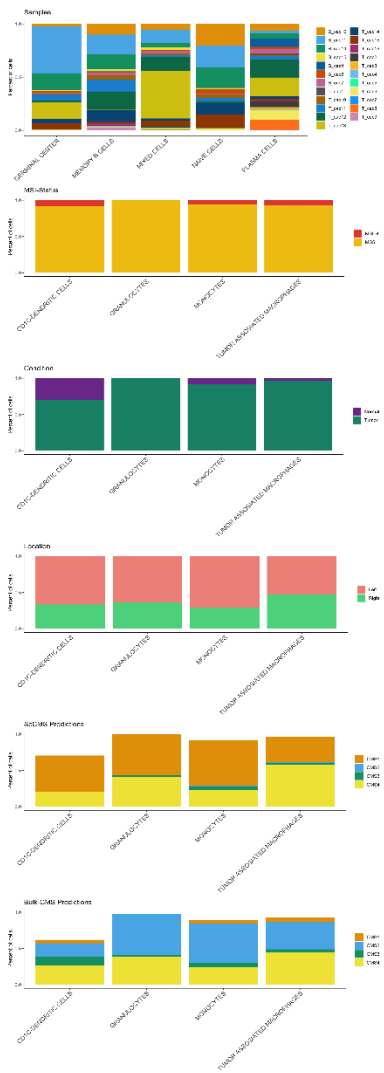

**c**

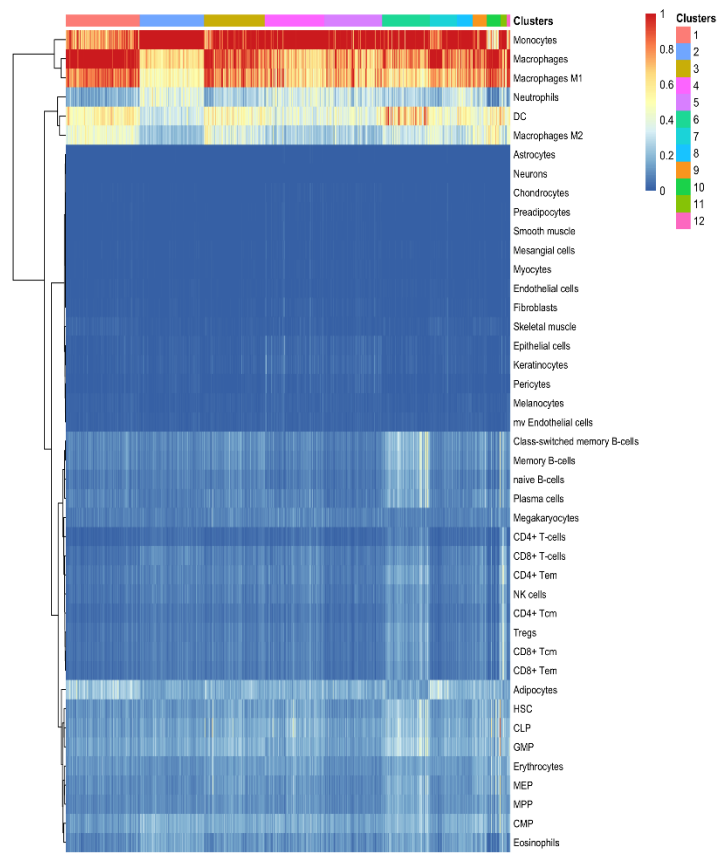

127 **Extended Data Figure 3. Reclustering of the myeloid cell compartment.** **a**, UMAP depiction  
128 of myeloid cell reclustering colored by subtype, malignancy status, and sample of origin. **b**, Bar  
129 plot depiction of proportion of cells within each myeloid cell phenotype colored by sample of  
130 origin, MSI status, malignancy status, tumor location, scCMS and bulk CMS. **c**, SingleR  
131 heatmap demonstration of myeloid cell distribution within each cluster. scCMS, single-cell  
132 consensus molecular subtyping; bulk CMS, consensus molecular subtyping on Bulk RNA-seq  
133 data.

134 **Description:** We reclustered 819 myeloid cells and identified CD1C+ dendritic cells, tumor-  
135 associated macrophages (TAM and MRC1+), monocytes (S100A8+), and granulocyte clusters.  
136 We recovered key cell types including M2 polarized macrophages, as seen in other tumor types.  
137 Monocytes revealed proinflammatory phenotypes (1L1B, S100A8, and S100A9), while TAM  
138 showed anti-inflammatory signatures (APOE, SEPP1, and CD163) consistent with the role of  
139 TAM in immune suppression and cancer progression (see methods).

140  
141  
142
